# Supplementary material for: Searching algorithm for Type IV effector proteins (S4TE) 2.0: Improved tools for Type IV effector prediction, analysis and comparison in proteobacteria
Source: PLoS Comput Biol. 2019 Mar 25;15(3):e1006847. doi: 10.1371/journal.pcbi.1006847 (PMC6448907; doi:10.1371/journal.pcbi.1006847)
Supplement: S2 Dataset — (XLS) [file pcbi.1006847.s002.xls]

## Sheet: test_Eblock.csv
Dataset 2A - List of 98 E-block-containing proteins used to test S4TE 2.0 E-block module
Locus tag	name	sequence
lpg0008	hypothetical protein	MTFTCDELKGLEHPYEVLGNGDALAENREELNKLSNDEKLVLASRLVLECPVNELKDFSHAIEAARMPQDDSDTFHSFLFQAYQVKKRIISLLDPRNKNPHSMILEKEFDGELFNNFNKLAIDVLNNNEVAIALRLAETTPAQDRSRVSQNINNIFPQSLFAAKVGHAFAVRRDIERLLLGDRPDQFFSSREFKIDSCIEFASLFNVINDKESSIAGKLALRTPAENRTDVVMKIKGFCAEDSELAIKVQSALALRRDIERNLLGDNPEQFFNSRDFSVDLCLEFAILFPELLKGHEQAIGEKLAKLDAKVRSDISRKLEMINGAAHEQSSPFRIIASAMVPKEEPCLTKPTPVVLPSTEEIVPKQESPTSLRNRNVLFKEQTEEHKKKNSQMEPIVSD…
lpg0012	hypothetical protein	MNTTEHTELGNGLLMDKIEGNPYLRIDEFGVLHLRLQRFGENNLPEPMELEMSAGEIIAMAGDYFTQANWTMDLDLPKCELFNSPAELGKHLIRKPIDPKEENALITAYNNLAAPDVTRKEIDRIYSINNANYVPFSPTLNFYAQQLMYYFRVKDYGEMLVRNQTHFTPWSIRVYILGHAIALRYARLSYELKQLATDRNYQSDNPDLSTLKISLQNKNETLSSNTLLDLANRYHAQAYSIELFTFHYYSDHFATGHMSMIGDLRVVLKERFGVWGNILANNLHDEVNRVGVYTVRPYDPTPNTTEAPSRARGDGKFDTCLNQFNRLACLNGMTASLKDINQVLSGGVIPEQKKFGGLVHMPDVDFNSRQHQPLLVLSKGKVYYRNNLSQIHIISPSEY…
lpg0013	pirin	MVIKMKAMEVEQLIQGTLIRDGGGVKLRRYIGADKTNHFEPILLFDYFDSSDPLDYLAGFPPHPHRGFETITYLMEGSITHEDNKGNKGVINAGGVQWMTAGKGIIHSEMPSSSTDRLHGLQLWLNLPAAEKWREPRYQEKSSDQLPIEVMESGATIKVIAGRIDQGLSSPIVEIATRPLFLDITLPANATIQQTIPDDYQAVLFVIEGTVNTGGQQITAGTLASLTNGERIQIEGKDKENRNHCLLIAAAKLHEPIVRYGPFVMNTQEEIMQAIHDFRTGHF
lpg0016	hypothetical protein	MAPVLMFISQLKDKLASYDRYKEHRINGLKAVFVLELMIIFYFFSSIDNPYFYYFYAPITCFTVEAAGTTLKEKYMLLLYTLLGSILSIFLFGIISVYNVLFIFFVFFYTLALYFLVLHHFKKMLVIVPLMLSLASYSLIYGVEADSNFYIAINNALYTLAAMAVIFAGLFIFPKKYYFDIWERAFLEVITGLESLSAKICKGEVKTIAIFSGIIVMERYSKMLPRNIKCYSILKITILSFELILTMSYLLSFQKQLRKEYVIVLHHYLERLCQSCKARQPLILSDQELPAFKETHELEILYQLILSWNYLCADG
lpg0096	hypothetical protein	MPKVIIFTDFDGTVTGKSGNETVFTEFYQSLLQGYKKDVEQDYKNTPMKDPIEAQALFEAKYGKYNENFDHDQQDVDFLMSPEAVAFFHEVLKNDDVTVNIVTKNRAEYIKAVFKYQGFSDEEISKLTILESGYKFNDVNSRLNHPTERANRVYILDDSPTDYAEMLRAVKGKGYNEEEIRGYRKNPGEFEWSQYLEDVREMFPPKENSPEEVQLPDEQGDEVSIGEETPVLLQEDNLSRREETATVLSNQPVPSSDFRTLKIMGAFAGIGFGFGFALGVTLVATGVFAPSGVGLLGALTLGAISGTGTAALSSAIGFVVAEGTEITSESVSEEAVPAVKQSSHEAMRGLGGSQLLSTNNIHPVGHFPSILSRRTPTKGKEEQCQEEYVLTNPLHNS
lpg0126	hypothetical protein	MTPLFPTQGPITIRQGIGGSCYLLSSLDCILNLGADGEQLIKSLFTQTEDGKVIVRIKRHEALKDNLQKNKMTGKYTHYVDELNNEDVFEISPERLKEIDNQYGGVKSNSLAIKILERLVSYYYAGDWSNTDPLASVVAHDIPDRIAGFTSTAFLGKFFGIQAEDIPYSKLDDIIKLKLMNPDEPVYISMSYGKVDSFGKFHGRHALRIDKIIPKGSGNYDFVLINPHDNSKTETYKLDDLNKRNCRFCLFNTSIHRASLTKKLLTLSNEEGRYIFSNSGLQKRLISLEEMHLLTDNKIISSCISLHKQIPYLEKLFLKLSVEEKKTLTACIANADGSKKEFLKLFLTRIPAMDLLELVLREETSQELLGEVLTELALSNPVEENKLSPKAGINFNGEA…
lpg0135	hypothetical protein	MLLLSIEVINMPDHNSSDIPLSQQIDEVRGLLLKALKAQLDDLIAGKLTPQPSGVPFVHFEKDPPQIATLKKVINCLYHAEEAFKSWESIDTSTLLGKAKAAPKLIRALTQIYKSLGLLDEATPEIRSVIADNYHLLEPLFTQAYTIVQESGWLSEFMEMDVTDKASKVIFQGMDLLGPDIDKWHDTHPLVDAFAKISKLVETISKLQEKDMPGKEKEQAVELVRALLDDLDNNPFISKLSISDFEDSKAIKDLLEWFKNIQDDGFDFSKKSIKQYVSWANHYLPTLITFADQLERQNYLKPGSLSTNLCSQIEHLGKQVNGILSEPNFGITERVVSIESLKGKREQQIHNAQANSVRAIMATEKQQAATADFYRILEAYKGMNLSQVTEPDRILLRQL…
lpg0160	hypothetical protein	MNLKKEVFLNQNCAEMMIKKAARLILGSDLDFEYTRDVQDIQIDLGPAFMFSPDEEKTLWVSGKNQETLERDLATLNKSSAYFFRTGTQGGAGHWQVLYYEAAKSGWVSYSSQSNHFQVTDSNGKLTASGKGLLVPHANWGKENGNYAFLLVNASAQNIIHAANFVYIFRTQNEDAAIQYCALNQALHPEIKRITITKVQTQTRLTPEIHCPRGDLSYANLKNVYSKHLALLHVINRLEAGSKSYNPYWMGSQEKLNKIFEALGHCYQKGLDVDNELNNSNSKLSKAINMRRLPSLFSFWCEKNESFVESRKIIEEHRICRLNNL
lpg0171	hypothetical protein	MKAKYDPTKPGLQKLPPEIKVMILEFLDAKSKLALSQTNYGWRDLILDRPEYTKEITNTLFRLDKKRHRQAIAQMMSGRVTASSMAKLFEELLCFSIPSSYVFLIFFASQKSVALIEVLTVILVFAAITSLAHDLVDYFIESDTKAEKQHAHRRAFQFFAQPSQSAAQQNLEEENLSADPKACQCEPL
lpg0195	hypothetical protein	MENDMPKTKYALPPVVLFESHADRSTSDFLIKQLPDLKKAGYTTICVDGMEPCASLEENISMMKILIQIQVKKLSELPLEHPEYAQGVEKLRSVVAKLDLFEAMKEQGFKLGGIDLPVSEQLKEKSLNSIRREQTITDNTLKHVKENDGGVVVVLGFGHCIFQQMIKEQDENANQYLWYHVHNPDNETQAYKELVESYTKKGLSTYFPLGVNIFKSSDKELDTDFWNKVSANCYNYDPKALETSTASILKSLVGPEVTAHLRTDGQHHVDALISLETVEKTHQIKSSDFLRSLSKTLGNIHFEVAKIKTKDQVIIRGINEPEVAEQISKLSKKM
lpg0196	hypothetical protein	MLLGDFIMSLEIYTWKNGSKGLGFTKPVKSMLLGGNVGHAAVELTFPADAKGDELAKKYQDVPGLSISKRTEIVPEKQENGSYKPKEQVVYFVYFSWWPGHTNGHHINSHREDLESEWRHEPAPKIKPEIQEHLYGENIPTANKTNVTGLLISDKTITKVKEISHQSIKETTTIENDPAYQQLKAEEAALQTELQQLIDKRKIYEQELARSGLEQRQPNKELCLTDAEIARGYEISKELKRVAEQIKLCQIDFEERYLSVGEPPSSVIRIPTTLDHNAPTFALDAAGILDKMASLAQSTTAYSFYKFNCSTSATQVVKAGISDELKNIMKTDGFNVEKASQTTIATPTSFRHFSQQVQTELILLNTNQALVEQQRAKTENTSEAPTTSTQSFKQKFQDT…
lpg0227	hypothetical protein	MSYSIDNPGGGDCGFYALAIGLISIIQNEYKLHGKSKTYDRWKQVENIYGVRLQDILNIDLTKLHYSPYTYKSELLFLLQMSLRNIAVIVNKEDLVKRIIEEGRSKDQTKIEGSNAYCKFMELVQLYLYRRGSLERISQFNELALSPEIVQTARDIARMLRPILRNQPFHQAQKIENAFVKEVLLNDVLSGNTINSNSIILKSLEKIKEQGRWATHDDLKEIAELLKINLNVVGQPNGKPIPEYPTVTLKNLSNTHWITQVESLQGPRQYSTPSKRAFGYETLSDRAVPLKEEQTLDRAFRTETQSERTRRYNQHFETLFDTLSPYGFFPHVQSKRNVHVFGKAQTGLESDEALAAQLQEAELRRILY
lpg0234	protein SidE	MLIFKSQILILKYLSRSCVMPKYVEGIELTQEGMHAIFERMGHPNITSGTIYNGEPTIDKGALDRQGFMPVLTGVSPRQDSGHWIMLIKGQGNQYFLFDPLGESSGKYYQNILAKKLPGATLSVIPNNAGLNMGLCGYWVASVGLRAHAALTQPIPPSLRNLGQTITQEMRDELTQDGSEKITQWLRAVGNEFPDGDIQPDATALRRATEKNVRIDEFQPVLTGTSPKEISINPTAPQEVSVPTWNGFSLYTDETVRNAARYAYDNYLGKPYTGTVEATPVNFGGQMVYRQHHGLAHTLRTMAYAEIIVEEARKAKLRGESLKTFADGRTLADVTPEELRKIMIAQAFFVTGRDDEESSKNYEKYHEQSRDAFLKYVEENKSTLIPDVFKDEKDVKFYA…
lpg0246	hypothetical protein	MYKNILFFSNFSRMRWNEYDGDRYQSLWEHNKRDIKHTFFGTIANGKDLREVLFQPVTASFSMLVAGAFAQLLVPYSIFMLCMGEAGFAGRTLINYLEITTVALAMPFIALLSTVGRCIATVKCLVEDQYNLAEMVEDKEVKPNKIYLDCAEVNYTFRDENNNQFSRKYYKFQYKMRGLNDELCQGSFTFRDLERAPDNDDFNGKLSSLTLYKYDILDLIKRVHKDKFEEMEDENLIRMSI
lpg0294	hypothetical protein	MPKYTLPTRDALLKAMQVGETSIEAAEYMATRFEQILTKAKLLPECNDMLEKIKEYAQFVKFKLLSSAQVWSGQERPTSDYQNTQENKAEFLASHLEGLPSGLKLEVAIGDDAKILRGFSSNGKMVEGDQLKTMDGLLEGWLAKNSLAISGGAVVKIDNTGNQTKVDPQEIRQLINDSEKGVAKYFADKGVGMEVAQRTYQEPKALETKREEIRQEIESGAEAPTTQSIR
lpg0390	VipA	MKHYDSMDQELITMPISNAFLKLFSEFVDNYARNGTPSFYHWAKEQNHEVINKFFHELLEIIKSNTETFHDVSIIEHLNATVLLSAKTNPYLLDCWISFITKYNAETNSFTPIGASMHIKVGPEGTPSERIIRELKESLVMTQQAFILAQKANATEVDSLKRQLEQTKQENERLVTQNQFLKDQVRAEKTFADLNPQINNARQQLSALTELIQTLSEITNAKPKIETVSSLSIPVVTENKSELLKENSCSVASVSKEVTPAISQEPKKRPVPPPPNDTDGQALSPNIPPKEDVSIKVTIPSMPKPNSTQPAAKNSGFFSGDGFLKELNAKIKERKERPKDEPHTTPVEKKNL
lpg0422	glucoamylase	MATFFFKTNYYQEIMLKRIFFLMIFFVSQTMASVFTHEEVQILKKHFLNNFQTNGAIVASPSQYNPNYYYDWIRDSAIAMGLVETWYEASQSARYKKLLLEYVSWTEKIQHQADPIAGQDILGEPKFYINGNPFDGEWGRPQNDGPALRASVLIRFAQQLLDHNEIDYVKSHLYNNTMDPQSMGTIKMDLEYIAHHWQDANFDLWEEVYGHHFFTAMAQQKALTDGAILAHQLHDRQAAVFYEMQANLINSRLKQHLDHQNKIIQATLLPHPGPQKTLELDSSVMLGILINPQKEGVFAPHHTFVQNTAKALHEQFNLMFPINKNRSGAILFGRYPGDTYDGYQTNSIGNPWFILTATMAEYYFTMAHNLSPNSINKLHIQNYLKKGDNYLRLIKQYGP…
lpg0436	ankyrin repeat-containing protein	MIKMGRSEMKIASAELRELMKAVSEGHYETVNTILDKDPELVNQYAPPTYDSPLARVLNKKHIDYKMLDILVKHHVDFDYPINYHKETPIELACKNQDLQLFKYLVQHNAPISEQAPHFLLVNSTNIKYLTEDKIKNTCEIIKLMGGLEAVSSKCDAEGNRFGEQARKSQLINRFGGIVKYDYMQLLQSVYPIVDREVDAPTIHGSTEVLTNLLNKIRGQFSSKETYDQQNLKDSISLFFMTGGEIPPSRKVPESRFEEAGIDTPKNAL
lpg0483	ankyrin repeat-containing protein	MDFVSEMNKILQMELEQFKEFIQKKLEEDKNYLEKLFWLPNGSQMTVLNYLIEQYSEPKLGIDDANRDLLAKIDFVLHEAKDVNVGEPLHQAIVAGKISLALHLLGVDENNFTPGESEKTDVLSILSKVRKKIEESFNHVKRCFFDVDKRDGYGRTLLSLALDAKRQELLIAILARNPIVHATTLRSSAYVPFQPIHQAVVLDYAEGITLLASMGAQLTNPLGSMRDTPVILAARLGKINALAALLELPTQSLSLESENNHLFEDKQTGHTAVEELCERMANENDKADALRGIAMLICRGAEPPRNEKMRNLLSSNRVAFLKAVSTYLADKPQLVDAFVERCHLRESALHNIVYADHSWGSSIRHLLGVPSEAALIVEELVTRKYSDPSFASENVSSLS…
lpg0518	hypothetical protein	MTDLRTEIESLIHNGLLPDREYVSAKRFINHYANTNEFWAGLALVGITPIINGLYACYYASRTVWATLRTVGNLLILKPGLALDALKDVGCHLTLSTCLLLMAPIHALTHAVEILTRVISSWFVGQEPRHDLLETGLMAKWANRVSGYQMVNELPSSNYLNKARFFSSYNNAWDCLEQMASPMTSLAKGGFHSLVEALYGVESAIECIVNLAICKPLHAKENFHNLQVHFGLAVSLAVMTPINALVEGIAFMTRLGTTWVSACLKPEVTETEHENTTAYQFN
lpg0634	hypothetical protein	METNMTFVLKEFDALKSHFNDTVKIILQREKKDKIEDLPNPRKEELQFLTAVLNQLEAKIDELKPRSLASYVHVFYGAMLLVCKDVENNLRVMEKKENSLLFTRLMDGMGISDENIPTSEQNIMFYRGLNKFLNFIYESNDSRKGLKKEHFLQVLSLKKIYSLAKLSYEQEEAAENNALAKLTADGKTKANANSFHVEKPIDSSIVEQFKSWDEMKGALHQLILDELSDKNVAKISALSQARSAQLKFLQTMAEQLDKIPNQSLEPSEKMAILAGAMYIVRGQIAQEYGKDPLSNDKISATVIHTGLSTILHANADCCEDKEVLIAAANKFIRHMVIERPEQSNKKITKESVRENNMFSDIAGFQLISVLTLIQNMIKTCRTDAIEACVTKRKEELEAL…
lpg0693	LigA, interaptin	MKITRNQLNFKGVKEFGGCLTRNDEQIEFINKEIKLLKELIEFNILKGIDENKSQSLFDAVIEAVEKAGLDVEHELLIQFIQSTSEIIDSKSTDLPELVSLLTVLIKSSKKYDKSELTRYCRLIDKLEKTDEKTLEQWIKILTILGRNVDSINGDLLFNVQSRLEIHSVLLKDISSLFDYPPYPALDVFSEKLREYSRELKLYIDSFDRDPAGARAPKVNQEGILVKSRERIFNEQFDTSQIQEVIAKIESLADGASLSCKRQYELAQQVVFINAIGRNFPLKIASATYTDLTQLGRNKLQELSDFLIMEMRRLDISKEDKLRTQLKLLAVMREQYFRSTGIFFDTTQMISLLLSLHHQEQNVLMEVSRNENLSAQPAAILAAMQWVLAEGGTVDVCFA…
lpg0898	hypothetical protein	MHLTREVNIMSILSAVSRVINNFSTEIKNRVVEVGSNLKKSTEEFIGEVVIKAAVNRLKQGMLNALSSSNDTTKDNGNDLSTNSPDIEDVSAPTLSSKKKTEANTTLVGSTGIMQKLLGNIGVNSEQSIEVLSKHFNGAVERFTQDVSKAANEAVCEKIKSIQPEDVVKGINSLIGNTLKVDSESGDTTLSFKLESAVQILGVILAAMGMLMFASQTKSTEQKTLEIEHLPTEEIQPPSLAIH
lpg0940	LidA	MAKDNKSHQVKTSEGSLESVKTKEKEPVLEKMRVEDSKKEDKLSMPTTKKESQPNEPVKPFKTSFEKWIESSLLDPQAKEDRGSTINLGREGLKNASQVKKFLLSPAGKDVIAELGAQMALQRNINLQNQQDRMEHELFKRRLMAALFLWYLSKKSHAAEKVKEIIREYNEKAIKNAEKASKPSQQSTSSTSQADKEIQKMLDEYEQAIKRAQENIKKGEELEKKLDKLERQGKDLEDKYKTYEENLEGFEKLLTDSEELSLSEINEKMEAFSKDSEKLTQLMEKHKGDEKTVQSLQREHHDIKAKLANLQVLHDAHTGKKSYVNEKGNPVSSLKDAHLAINKDQEVVEHEGQFYLLQKGQWDAIKNNPAALEKAQKDYSQSKHDLATIKMEALIHKLS…
lpg0944	hypothetical protein	MAIAPQQIQERLKQEQYQKFVVADIGNFPHCLAQTPEGIASGQRYQKYSTNSLSRTPPFSQWGAPQLLTPKSAQEYIKFAQQRNKKSSFKIDGEAVRVSECSNFAYHSAGVLLDDPQIRTQYDVAVIGSMHSNGRYLHNITLLVPKGSRLPQPPQQLTAEVFPIGTLIVDPWAVGMGHPPEQALAIPKEQFAYNRSLFPATVNYQSALDESLTSTRTGQLTPYTGTPSRTGRQEVRAESQFPGTRRPVSATIPGNFAAYHELWRNAFQEIMNDPRHQLHRNDVEYKKIHAIRTVLDDYTKGGNTWWAKFRRIFTFHWNRHHVKVVDDIVKEIDAGNYTTSRALVDRLDNLAISLGSKLNPKGTLKEQIGFIKIQEQNPVEEIENLSRPNLT
lpg0945	Gala protein type 1, 3 or 4	MVLTLSDLEKGYDKNLNQLSLSFLNLRDNDIPLLCEFLQNHPAITSLDLSHNDITANGVKLFVNKTSVSSLNISHNNIGPEGAQWLSEDNHITTLDVSFNEIGDEGVKALAANAKLITLYALYNKITKVGAGYLAQSNLKKIDLCFNSLEDEGVIALASNINIKELIASACDVSDIGAIELAKNNQLTLLILGKNAITDKSTLHFANNTSLSTLHLGSNQITAAGKKILETNTRITDLDLIGNPIEVHETDELNYSKKSPDSHSVFKFLQKFTFLSCMSPCQETAESDKGLNKKPN
lpg0952	phosphoesterase	MTNQYPKIGLALGSGSARGWAHIGVIQSIKRLGVRIDCVAGCSIGALVGAIYACGTLDLFEQWVLKLNKREMAKLIDVNFLGGGVLSGSKLMTFFKDFGLEKNIEELSLPFSSVATDLSTGREIWLSKGSLELAIRSSMSLPGLFTPQRYKDCWLVDGGLVNPVPITLCRAMGAEVVIAVNLNHDLLRVPPSTIEHPGFFSVLSGQFDKMIKRIMGISDGPGYYDVLTRSIKIMQDRITRARAAGDPADLTLVPQLGNIMLYDFHKAKEAIHEGENCVLREKNNILQLVGLE
lpg1101	hypothetical protein	MTTSVSFDETSKRNEGRVKNIVYLDFDGTITGAHGKEVISSPLCEALSTKATFDERMRYKNEYDASDNKIKITENAKNFLQDVNKLHPQVKIVIISRNHENYIKALLEFENIDHRNIIIYPRGVGNTIGPGEDKYKAVVSHEEKPECLPGFRLICDDDEVDGEEMCNGLIHTGRSQLVKFHNEKPGQFKWGEYFKEILTNCDIAVKEYLNGKIGSRFHLFTAKVDEKTGDQSFKDRYSQVKGDILKRAIINNLKNDIEKIDNLDDLKDFIKKFKQSSEYMTLSKAQGLFTKVTGIKTDSQRAVEEIFSKALKDLQSPKLAMR
lpg1109	hypothetical protein	MKYFLKLSRQHSSNQKKRTQPAQFEDHHLRIRQPQYAPITIDLVGSVRFIFTFSLFCFRAIAGLLTGAISRKNLFDFVFNRTKTGLTGSIEIITVRRRLTKATQKIQEITPQKSLLERESEEPSISTNTKPTIKPNTTHKQNVFFTKSEEKSETKQFKAVESHDFNNSEELMAFMAKINELIAQDEAMASPKDENESSSTVGEEYIEKLIEIMKNSELLKHEFWSRLDQMTYKDIQLFVSKLSPTKEKGKFGSSDLDYLWRYFNGFEFEPSKRENRKDKFAVMLEALSEEQLKASFDSSDFLSLLNKDYYIETAANTLKRKQLALFASDSKRHDILNLMIKKLKPSAYLLGKLASVMPYATTKIKIALIDQIAHLPHSASFKIELAKLAEHHIGMNTQT…
lpg1111	hypothetical protein	MPTYFDPIMQEDTVLDENTIVYLVKIGDNKFSIKAISSGLEHLPSDPTTHAEKYWPIPAKSLIDHSSNKLLFEEDKLTNQPISKDQVIELFAVDPDKTEPKQFSDSVKRELTENWAREVLQDQFAHAGQNPHFFFYQPLFIHGHHGDNPAQQQDNAIPIPLPLLMFSLIPPMNNNNQQQMTLLFFNILLVPENQGHEPEQENTGEHTHGHSH
lpg1129	hypothetical protein	MPTGIVLSSQSPEATTSFPRRGGTAAGINHVTGFPVIKMHRDAQARPDERKYFNQIKDGSLVFITGHSNTALDHLTGDYVPPLATPVQPMSTEWTYKQFRDLILKNGSLKAGDTITVVLWACNAGEGGLSSGAGLLGRLFREKQINTRVIASAATTMRFDGHYSPTPEGTPAMAFITENGSKDIRIFDFTEEATIEWKNKGRLYVTCNGIEGYNLYSPKQLESLESEKIYKVMEEIFVDRHYKENIRTGEEVKQYFSKSKAEFILRWSSANESDTENKYVFIAASFQASDGIHSIRYGINKNGELFSINTASNKVTPIDILPLGVMATLTQHITQNKELIEKALHEKGAQMTPSPKLQHRVKRKKSDHTELLILKGEKEPLKPVQTDTLSSKVPASPGW…
lpg1152	hypothetical protein	MALIYQGYAQQKKYWPASNTLEKIEKKIKLSTHKPILILEKVMYTKRDNHLLINKEEEQEENQKTVFVPQTNSLALPETQSYFCTAEQCSLNNPYAPAQGYTRPDSLHFKTTPINSEIYEQVFKVSEETVKTETQFANRAPGHLEKEENRSGDWSGFIPDELYQMMMEAAKQGIFVSFLLTLTDEIINDYLKNHHYSQQQINWISQGIRALTLIAIGTSPGIALGLPISTLLLIEQLGFDKTNVNYLTTSSVVAWGLLSSPFNLLNTSLVMASSIGASVLTSKITQSSYQLVRNRFFSSKPEKEELEQENILQKTIQQ
lpg1158	hypothetical protein	MIIYLSIWLIIGMKELIAFIHDLYKDRTEKSVKFESKGRVIVSPLMSKDDAQELFKSLKEILPEEARLKVRKSKQEPDQFRVVLFNPEKFFSFYAEHAAELLNRFKPLPTSSSGEEYCKWKYNPLSHLIEYTVPFSILDSDTKAKVTDTHEEAIQSKVNQYNEKLRSIYPNLKIIGTNSVEDSSPDKFFLGSFNYNDYKIIKNLNNPASLRQLAIGFFKEHPGHYTEEVAKKIPGDMKDEFTDIEPSSTKPSSTGS
lpg1166	hypothetical protein	MLSQGVRSMGKEKRELEASYIPLPKKGRFWIHSESCYTEEELNFREWILKIRSNSGVHPDYLNNPSSWFANDDQALVNLYEHAWFYSNAYKPRHVLSLDDFHVQPIDNQRLQWPQLYDLMQKVGDYLLLRNKELPPEHLNQPMNFVLLDVNNILKGLSQNNNIQQVKEQLESVTRYLRTIEKNISPLIGSDRLFLANFRKTVDTKIHPHLDHMLETQLLRDKLGELSKDIRKLSSERNRILHYALNANSVNPHSYEFELDKISDSASYPTQAAKHCAQKSNELVVDPLPILHLTKEQLSDCPHFKLITMKDEILDHYAKAVSDLNELERFQKVIQEIMDLLGQAGEVYTVHQFKHQMQSLLTQIDSFIDASSEHIDEIIDANTQAYHKAIQEEQNLPFW…
lpg1183	hypothetical protein	MCIEKILEPVIMSGIKKFNLTYQQVPKIFSLPESVFLSKDVELIPEEVLKQTKTQKNIVAKTIEQIDKDLERTCYVDFDGLTVAQLKSDWLTVNPQGDLALSEGVYPSFSQGDNTGAVIGEILQTKHFSLPLSEEDPKAFMEVTRNTTRICFSYKNSAGQPSGFSLVAAPNGDSEGNHKGWIISVIQNTVGNYKGRKVSVLASPNYVRSEAQSTVDMDTPDAIERELKRVINNDKVASLIKGIFKEDGTLNADYIRQLASRIKGNRNIDDRDRKSAQFNILIELAEQLDDEKLRHYINSIKADMAADIEFFKDGIYEQHLSELSNKISLSLSKMPSVNKKTTEIGRILNNISERYAQIKMIEDAQRKNPELSHIFKAMAQKIKSDFHDIKFDGTHHDNR…
lpg1227	hypothetical protein	MKTVNSQNGTSAEPSVNLGKLSTAKNLVFRGGGSKGIAYVGALQSLSEQGVLENIENVAGSSAGAMTAAIVACGGSADLMEYFCSANSLEDFVDNPLTRKLAKLFMDKKGFLAGILIELFKSNKMLPSDSSAAYTSLSHEQTDKQLDAKSSLAEAKLVTKPSKLTFPVASKGTKLVEAMEHVMRMAIFTHFPESLDNELKNVREKLNAIEDKGSAEYINLAKRQQIVEDTQKIINGLHDPNFDLTFGHLHTLHQYDPQRFKELHITGTDENGELRIFSHEKDADMPVSIAVRISASLPGVFDPVIYEGRKYIDGGAANNLPVNIFFNKEEAYTPGVVTTIGVSCENQLDITEKEFKNPSFMERIKEYLGDFVKKILCKLDVEGAVKEQKREMLKYIDNG…
lpg1290	hypothetical protein	MPQILNALAAVIEADLVKLNPEQKEIVDKYSDKLLNVQYKAHQPRTFELAVKTMKEQLEQLSTSLKKINSEMAPDKDKRRHEMIQKIESDLKLIESCINGDFEKNYQNLKKEFLQFLHEADSKDPFLKKIHGLLEQDNPSILYLIEQELESSYYKDKYSQQFNQLILLMKLKVSHIPNPVVTPNLLQDVSLLQLEGEIEKQRMIAIIDGQEPLARALKYLSIGCTTTAARTKELQKTIVQHGTNLQAYRHQEKCRELGGRIVLHCSQAMLPGMGLKSGMCHGLARHWANDVIKKDRFMGFRGNQEVSIQPTKATDKILQAIPSFNDFVRLNPKIYETQQSQKEHIFLEYEDTVGSEPEKQFEEFTDRIMSELDKYGKSATFVSYANSSSGHVVAIHKRT…
lpg1312	coiled-coil-containing protein	MILEFFEVVLIMKSIEYFRNELNELFKSKKNGYKFKQEEKSPEQNTESDEYVLSFDTLPEEGIDRDNNTFYYTTSVDEICYEIKTSSGCLRTGSFHSNNHNNLEERIFLNAAEKGFVENLEVLKNLATIERLIKELEKKGTEHEIKKYSSELNDEISLYNDNLRKISNIFPDIDKKILKKLEINNSILPLPCPFDTRAVQVASHVPNQEGTYRRSQSSNEYHHTNKRGNVITYKNFNELKNNDPNLGEIFLGTDNNSLYVKCKFKKSEPAKLLPISLYSETKNNIINKLNSNRKLTNNELLAIISAIQSKDTLILKNQLNKFGCNVEGVIAGNGEAYNIGGNATRVDKIIEYQSNGISYKRGNQLTLKLKDRVLEHKTNVVETLVRHLKDENFKCLKVD…
lpg1317	hypothetical protein	MKQKIDYIARYFKLMSPIINREEINNIVKAQDELEITGAPEHGSHKLSIVKELETGFEYVQKQTKNQTETEKEFMMASFLNKVNPNHPKCKLVETNNGSVSILSRKQENTQDVEQFVRAGRTNELLEKKVIGLEDTLIADNILGKQSDTKLANMLVKDEGDTLVFSNIDHERANLPTFSLFNSGQRRYPTSAHELVSGIADLYEPSDDNRSGLAGDKRAKEFGEVATKVIKQEKIKSAYEKVANADIDSVYKKCSSLSQNSTFFGGKNNCNAYRQYFKEIQKEAADTVSKFDLKK
lpg1355	protein SidG	MFLPKGGQKMSRSKDEVLEANDSLFGITVQTWGTNDRPSNGMMNFADQQFFGGDVGHASINMKLPVTDKTKQWIEKYCYSQTYDQFKKVKGNEDKTYEEYLKTAKRLIPVELKTQVTRKAQYDSNGNLVTTHEKAYEQIYFDIDWSWWPGRLQNTEDDMVWEREGKHFEYDEKWKEYLQPEQRVHRGKLGSRKMDYAPTSIIHQRDIPTSELEKITRDHKIHTIEEKLNVVKLLQSKIDEMPHTKMSPSMELMFKNLGINVEKLLDETKDNGVDPTNLEAMREYLTNRLTERKLELETELSEAKKEVDSTQVKNKVEDVYYDFEYKLNQVRKKMEEVNSQLEKMDSLLHKLEGNTSGPIPYTAEIDELMSVLPFLKEELELENGTLSPKSIENLIDHID…
lpg1483	serine/threonine-protein kinase	MPRTMFFSVDAANLQNLQITNQKAFAALESYLNDNDSPGAWNNNQGYKYTHKDVTYCFSFNQSLVRRPRKSDQKKHTFEIFDPNKNPLGKGAYGIVYPILGTIQFEFGNAIKRPPKNKLVKIQNHSERDQSHSVLREYQGLLQSGHIAVKPPIFVENKESKFSYLIMEKAEGIVLEKFLNPIKRLDLSEEVPELNLINRIEITFAILKAIKEQVTDKHLIHRDIKPGNIIIDFSKSPPIAKVIDFGFVLRASEQDYRRCGTRAYRAPESFNTQALYTAKADVWSTGRILSYLWGDKYTNYYISRDKGLDYVIEKSRNELLFSDPELELYLTKEDKSKIRSCLSAMLIVDPEERGSIDKAIKQFSQIDFEKYKRLKRSTNFEIDLTDNDIKLRKQLNSIH…
lpg1588	hypothetical protein	MSHSKREQNPIARNLSDFRQVATLLNNEGLVVTEHNYKKVQALLNRYKELATFIDQNQSKLNGKQIGELNQIRLIISPEERREIRKSVTRIENGIKNREERIKEEYTRIEKQQAKAREVVQVLWPQLQKAAKKFINSGIANMEELLKEYKDLRNELYNHALNLPTQERKQKNQEMAELSRLVNIHESKLYEEINRARNVIEAAVTQAQKNVDSMSLLQMVRLMLPKLKDADILKIAQKAGVLSLQDTTTSEHGANLDKLVVREQPLEKQSALISIMFKELALNGAQAGPLAKYLQAVQENAKDLISGKKTHFTLLYQTNEGEIGGFYFNIHELLQNQHQAISKLVHEMYKRGVDQNSRVVMAFASPEQTASLMLANGENIKALTEAGNLQELTEQLLEN…
lpg1602	hypothetical protein	MRVELFNPSIKKIIVKLSQLKGLWIVQLNLSKNRLSEKKFTDLAVLLSMLKAFGVTYLNLHFNNLGQKTGTELVALFKILKDSGISRLSLSANELYQKTGTELATLLTALSDSDIIQLDLSCNWLGQRQDAELIELFKAWSSTPIIDLDLTNNDLGKKSGIVLSEMFRALKVSSISHLGLRNNDLYQRTGAEFSSLLSAIKDSPVTHLDLSDNGLHLMVAAAFETLFDALKDSSVTHLNLCRNGIGHLDMFQMTAMFCSLQCTGVTHLDLGENSLELMTAEELAAIFQVFKDSRLIHLGLNDSYLNNRTTEDLHLIFNALPANIATIKLSLEELTEMSSEQRQTIQRRFPRAEQVILVNNMEGRELNPSLSLGDANVYRRLGFVGVSPLSLAGLASFFV…
lpg1660	hypothetical protein	MLTLSLAKCINATKNGAFAIKDLDLSGPLSYEDVLFLAEYLKVTPLTDLDLSMAITRENSKALWDLSQVIAKNSQLQKLTFEVQLDFDFYFKHNLPIGWLDFIDDYRLKKIAAPLHEALVNMLKNKPALNKLTIDFLVMETPFHNKHLNQLARSINKIPLNYLNLGLSVTKETQVPLFKTKEPNQTLEFLILRGFNSGRNTLKYLPQTAALKMLAIDDMQFEEHDLKLLANIMKSNSSLVALILGKTNLGQVNSPDVLTWLSACPNLNSLILIDNNLSRLNVDSLCELLANNLQALKKLDLSKNAYMGDDAIKIAKALTFNTHIETLVLDDNYIENEGLQAFIDLVKNNKNITSLSISNTCRYTPSNEIIHSLCDLLRDPGCQLKELKFNQDITLAQYL…
lpg1683	hypothetical protein	MKGKLTGKDKLIVDEFEELGEQESDIDEFDLLEGDEKLPGDSELDKTTSIYPPETSWEVNKGMNSSRLHKLYSLFFDKSSAFYLGDDVSVLEDKPLTGAYGFQSKKNDQQIFLFRPDSDYVAGYHVDAKSDAGWVNDKLDRRLSEISEFCSKATQPATFILPFVEMPTDITKGVQHQVLLTISYDPKSKQLTPTVYDSIGRDTYSESLSSYFKGKYRTTCDEILTQSIEKAIKSTDFTLGKFTRAAYNHQNRLTEGNCGSYTFRTIKEVISSSAQGTEVKIPGSGYITSNSYLTSQHVQDIESCIKYRNLGVVDIESALTEGKTLPVQLSEFIVALEDYGKLRSQQSEKSMLNFIGYSKTAKLTAVELLIGILNDIKGKNEISESQYDKLVKEVDCLMD…
lpg1687	hypothetical protein	MSHNYFRTCLTTKDNKFFWQKPLASERFDKLIADRKFQKSIAHSRKNQLMYSFIESKIASDYALLIDTKLREQLKQFTLDDFNDISGFERKEKSNSRQQSYFKLRQELEFFLKNDIQQHKSCPDAQLNAFRRWINISDLLLRHHCYEGFLLVFVNLQLIADKQLIDGLPVSVRNNYNQLCQLSSPIGNHGALRHFMNTHQGESDFTPLFFTYHAIGALDESLESLKDKEVLLKKQLKHLNKKISHLRTEATPGVIDVISELLKNKQQIPKKMMERRGHLIQLMEEVRFTGKQLKQIQVNMQNQLEQRANLVGLIVKEQKATPRTLPEYFEKTYSIIKYRFNRQSIATVKSSQLPESTASSNPSSSNLYKSKLLPHFWNRHGKSSSSYWEEVFTPSCLNNK
lpg1692	hypothetical protein	MARSKEEKALEPKDAENKFRVLTSDVAGNIPTHSSVTDVLNLIYSSITTHNLFKPHLEPLKAKACVVQGDLATLILIAQRNPAALFQKGNITDPRERTFYNVSAWQLILFLCDVDMKNQLMPFIPEQFKAIAQKQTNELGSGGADLIKLSRDPQAVAFEDFDGLTQFKQTLPLIDGTRKEVTFPLLENVDGIVYFQDKNKEVHFYYANRESKTITSLVPDLKSEEDKQLFAAFKASFDAMENNSSRRSSDTEHQLIAKLFNAKPQRQGIQYEHQGIRYQDSRTSFSLINAYRTSIRLYDEVQNYQYEKADTYWREVVGKAQGEEMWLLERICEEGRPFHPLPADFKEFKRGFTFYNWITNKVESAFAGGKLAVGLGSDFALYKGRLGGGRGWAAAGWDG…
lpg1701	kinectin 1	MIMFLANCNIEELVTEHIKQFLADEELSFSGLKDLILSKAPIPWIHSSVTATLLKSRDSDKTEVKKNLEQQSYKAQLAEDKIQKEQDDAEALKDKKLKEVLTRELNHIPTQISEQQTELRLLHYKLERLFESQAKVDVIQHPDSPMKKIKPSSSHSASIERLQRSINEREIKIQSLFEQEVNNKIKLNEIEKRASVRSQHHTKRVKRAQARIGYNSTGEDILSTLSGKNQSILLRSIQKQHHALEKKCSDLIQEADQINYPLFLEELQKYLNKKKHTLSSQEVDALKSVIKYIKQHLEFEHEVINTQSSLHIKKQSISSQIVKLRELQNKLKTLKNNNPNLTAANEELVSRNLELTAMKEHHADLRHRLGTPALLLFGLTFLFSIPLILTISGVIPFFI…
lpg1718	hypothetical protein	MIILYDFLQESSVMPRSKNDSKLKKKSALQSKFKEQQLNHGSKEHKSKFKFSQRKAKKKGPGMTHLPGNIYTLFTPVNGPKSKDEWIDTSKIMLDLHIDNMSSSDYIPSAIDRTDLVMVQSVHLLRKTGGRGLFAREDIPKGTCIGIYTGEVYSEQEFEQYLKEHVGSDKSYAMYVGGRVIDAARKGNLTRYINFSDSQDNAEFVETTLNRKKVAKVITTKNIKAGQQLLINYNTYEEQASRYYYFLNPGDGWLSAQEFYQTYQSQYRLEQMPYNLEGFDLKAGDRVLMTQIGRIILANYSLAKEQELNASDIDLPFLKVGSDEKILDFDEADTFTPLMAACYLGQVENVKWLIEHGANIDQQQSHSGHCPLSLTLKGYSLAKDTQKYIDIIQLLIKNQ…
lpg1752	hypothetical protein	MRFLRVGPCGRETMLEFAEFQQNALKLTDQLKKRSIPSLGCFCFFSVILPNTAAIEDTHTIKLIAYSLDSENDDDLIAYLKGVTTYSAVTPKNINEFKKKVLTGIYLMMWSHYSSTVSNLMNSTLVELFQRDLQVSSPQKMSDTLFDASLEALSQYCSFAYQNRNERIYDNLIRRLGKTVQADIHALRHSREKQETSFYDIYKGIMRTLGLNSVF
lpg1797	hypothetical protein	MFKFIYCINQEHIMSITIHTWKGGTKGLGFKTPVKSTLFGGNVGHAALELTWPANKQGDELAKKYAQAHGVIISKRTEIVGETQEEGRIMPKERVTYFAYFSWWPGEQNGHYINSFNDDKDAEWRHEPDKKMHADWKNQIYGPQGMSEENTTDVKGILIKNKNIQKLKTIQHSTLTADIAQDKAYNELLQHKEKLDEEYKSLHAKAVAYQKEKENAIREEREINPNFELLDEDISRMGDLPREFSILEAQLNLCIADFNERHLSSGKKPDSSVILPTSMDETSLNHTLDTESILREMITLANSEKAYNFTKFNCSTSVCHIVKAGVDEKLKENLSDNGFNINRYVTSYITTPTNVNALGLKLQDALLKLELAEHTKEAEQVQKPVANTISNRFNEFKSR…
lpg1884	microtubule binding protein	MTDTPKANLAVDEIKEDTPKDQPLPEENTEILVKKLKVLETTQENFDQIKKHIAAVIDSLAKNRSFFGRVAAYWGEMQLWLKITLGIVLVVPTLTLGIAIQVASLIVVSVLTLVTYVGSALLLENHVQKEEHITDRLKEEMIGLADNLGKVIESFEPLRKQIAEQIEYFHKENDRLNLNVTQLSDHIMRLTKQAEQLQKTEQTLRKVREELEKTSETLDEKVQVQTELLQINQEELNRIREEIAKNEIELSEKISELDQVKKEMSVEIEKAETVTQVLKNTVEKLSQTAIADHNHRESFQNKLNDFLSNKEQSFNDVAQRICEAEHELCFVKEELNFSNKRYQELLERQEEVVKRLEQLQFSRKPTPYSNAKVLGKLGIMATEEKESPTPVSAEENTIP…
lpg1953	hypothetical protein	MIHYVSLIHFNELFEIMKPNLFYFVLTHILAESPNLKLLDEITPVHDITLKDKKYYRLELPLANIAAEGFRLHDAHISLYEKTDPHNPNLGLSHFTAIFHDQNGQTYRMHLFLNRFDALACPATWELLDDDEQYVKVPPPENLEYFIHSVWQLGLPCLQLLRKKQKEIEAKLLADYHRLNEETTSLSKDLDKNRAVYLEKLDELIKTTKSLSQISESNHWLREAIYLGKTHKYVSSMPEPILEPVKKSDEEHKKDDKAEVVALSPKQGATEPKISRGNIGLSQSTLFSKSAKAKRPVDVKMERDISKIKKLFAQLLKTEDKKIKAVLLIDLHWKIKEINLETEELLTKEQTQALNEIEGRANKEAKSLLERALFAGEFEYAQTLSPYYPLINNDLMVLA…
lpg1963	hypothetical protein	MQEKIINLGKGLKKVNEGIKKHISRAEEFLYLANQWEKENIKINDLLNGVQFTVNDKKMSGQEIKEELSNLIERYNNFLKKNLKGERSETLELKEIQQQLTNLYNAVNDIYTYLSINKTEFFLEAIKSCYKKDQRMGSTIQFVLKIADHLSKERLQFNLNLNSQFAEASESFQEVTTKFYREVATPRIESAQKLLELMNNFVDQYISQGASPEDAIKKLKPFEKYFTIEISHYEEFGHLVYKTNFNCNPALFDVNPIEFLNELFVQFYKDTTLSSRSKTALKQVLDKFEITYEVPKTWYGYIGWDIPIVTDKNSVLVTYDKQAYYRYHQESGQREMEFFETIERCLDKSKDIIIATKKENLKDQKEFSKLIDKAIKELEETKKKRIFQKEPHELVTSII…
lpg1966	hypothetical protein	MIKDILNTIASLVEENVVVFASERGKQLLQKVKADLVSFKPINFYALDAGKQITDALKLIESYCIEMNRIFDELNHQSSVSLANEKLTHKIKNILTNLKNKQNKITQLREKIPEGMLDIKRALYIVENSFLSESEPEEKELRSKFKRIKKFMSNSNKEYLDLIKKGGLLNTVLLDTTTLYWNQLHEYSTLLNQCRITLQKSHHLTKEGQLALRCFNSAIQKMPPKKHIINALKILNKPNSKTEAIEKIGFVSPHGREACMQLTCWGKKFFYIPRSEEMYHFDYDPKEDLNETGGNCFGESMMFIHFLSKGAIRWLCPEAGLINFQLDQTRNLKFKKATLGEGETLVSDNSPHDSLEWEDMRPVLLDNPYFKPGSLCGVIFSMNDYTKAKREFTAGHMIV…
lpg2144	F-box protein	MKKNFFSDLPEETIVNTLSFLKANTLARIAQTCQFFNRLANDKHLELHQLRQQHIKRELWGNLMVAARSNNLEEVKKILKKGIDPTQTNSYHLNRTPLLAAIEGKAYQTANYLWRKYTFDPNFKDNYGDSPISLLKKQLANPAFKDKEKKQIRALIRGMQEEKIAQSKCLVC
lpg2148	hypothetical protein	MIVRGINMTKIKLESPGFMVHKKLKSMSQSYGVMMTGVPAEVLGQMQAERSIPSINKTGNLKQQIAKEVSKVCHMMTEPTQSCGQASNDVCELLLGKIEAEKFHFTKYEALSADGDNLKNVLENTAPSSTNLLIRFEIDREDPPIVLVKTKNENFNPETAVKNKIYLLENKLYFIDKMGNLFNLGPGKKKCTQLFNAIGDSAEYSLCDPFVLEEPEKPEDFAISEIVDIFNEQKERFDFWIGSHSFTIYIPQTLGESPRQFYPYQAYFGSHTLQDWFVSDKDEYLSRIGIDKYIEKLAVLGKTTNTKERSDIYAEFFSKRGREAFFCAHLNEKRQPLRVKFKITEINPELALKNLQETQEFIDTHPGENPSDKVENYRNRAKLAMTEHLESLLDIKPES…
lpg2153	Sid related protein-like	MPKYVEGVELTQEGMHAIFARMGHGDITSGSIYNGVPTIDTEALNRQGFMPVLTGVGPRRDSGHWIMLIKGPGNQYFLFDPLGKTSGEGYKNTLLAQLPIASTLSVIPNEPGLNKGLCGYWVASVGLKARSELSKDNPPNLETLGQITTDAMKDELTDNGYLKITGWLKAVADKFPEGDPQPDAKALRQTTEKDLHIEIPSPVSPIKDTAPKEVSTKPTAPQVAPKHSLDSKLLENDDDVLDTIKYVHKEYLGKPYPGPLKNPKAPEEGRLPPNEGPDRGPHGLAHTVRTMACAEVMIEEARKAQLRGETLGKAKNGQTLADVTPEELKKILIAQAFFVVGRDDERSGYDDVHKRNFYAEYHEKSEQAFRKYVEDNKLIGKIFKDQKEVDFYAAIILDK…
lpg2154	Sid related protein-like	MRTLFYSQLMYEAAKRQPHPHRCADGRTIADLSAQDLKKLNIAQLFFVAGRESEASYGDAYHRYHLYGAKQFEEYARKHLTHLFSEKEIVLYSRCIEDRIGDRFDETAEGYLIHLSHMIDLMRCKSPVEVFIGHSRGVSGIVPTLIQLFGREDGLDIMHYARSLFAATGEAVPYISSSEWPHLGIESDRVERALKIVGPLEVEGQEADAKKTAQAGFSVDGCYGALVKVDTPDWYHQVKEKEDYDVDEVIALPPQITIREEPPKANESFLLSLLRHVFWCCPSNQKRDDENTDVLEKKAQL
lpg2155	hypothetical protein	MFGFIKKVLDFFGVDQSEDNPSETAVETTDVSTKIKTTDTTQEESSVKTKTVVPTQPGGSVKPETIAPDQQKKHQIKTETTTSTTKQKGPKVTLMDGHVKQYYFARRGETSTHDTSLPPPVKVLSGRSIPLKEIPFEATRNELVQIYLTSIDKLIKSNKLNSIPSQQIASHYLFLRSLANSETDGIKKNQILSLAKPLGTYLASKEPHVWKMINELIEKSEYPIIHYLKNNRAHSNFMLALIHEYHKEPLTKNQSAFVQKFRDSSVFLFPNPIYTAWLAHSYDEDSSFNPMFRERLSTNFYHSTLTDNLLLRTEPKEVTLSSEHHYKKEKGPIDSSFRYQMSSDRLLRIQGRTLLFSTPQNDVVAVKVQKKGEPKSTLEEEFEMADYLLKHQRRLDVHS…
lpg2156	Sid related protein-like	MGESKMPKYVEGVELTQEGMHAIFARMGHPEIKSGTIYNGVPTIDQEALDKQGFMPVLTGVGPKRDSGHWIMLIKGSGNQYHLFDPMGKISGEGYQDILATQLPKGSTLSVIPNEPGLNKGLCGYWVASVGLKACSALNKDNPPNLETLGQITTDAMKDELTDNGYLKITGWLKAVADKFPEGDPQPDAKALRQTTEKDLHIEIPSPVSPVKDTAPKEVSTKPTAPQVAPKYSLDSKLLENDDDVLDTIKYVHKEYLGKPYPGPLKNPKAPEEGRLPPNEGPDRGPHGLAHTVRTMACAEVMIEEARKAQLRGETLGKAKNGQTLADVTPEELKKILIAQAFFVVGRDDERSGYDDVHKRNFYAEYHEKSEQAFRKYVEDNKLIGKIFKDQKEVDFYAA…
lpg2157	Sid related protein-like	MSLGEAIMPKYVEGVELTQEGMHAIFARMGYGDITSGSIYNGVPTIDTGALNRQGFMPVLTGVGPHRDSGHWIMLIKGPGNQYYLFDPLGKTSGEGYQNILAAQLPMGSTLSVIPNGSGLNMGLCGYWVASAGLRAHQALNQHNPPTLLNVGQTITNEMRNELDHDGYRKITGWLRAVADEFPEGDPQLDGKALRENTEKDLKIEIPTLVLPGKDTSPKEMSVKPTAPQDKSVPVWNGFSLYTDDTVKAAAQYAYDNYLGKPYTGSVESAPANFGGRMVYRQHHGLSHTLRTMAYAELIVEEARKAKLRGETLGKFKDGRTIADVTPQELKKIMIAQAFFVAGRDDEASDAKNYQKYHEQSRDAFLKYVKDNESTLIPDVFKDQEDVNFYARVIEDKSH…
lpg2162	hypothetical protein	MTDVRQEFLLREAERALREKAYATLSNIVRKVKIFNDDGYYFDTDVVPIEKLPAITENTPFLSQAKASYGAEFAKHRFVISALYGSKHSPVFNEALTVMHETYQVKSLQDAIRENPEKSDYLRSYYSASLMLSRFVKRLYTNEQDYQKMIEDCQNEFGNPTAFQIIQDGSWGEGLNAVLMESKHLAATTIQRFFRVAQALNQVNSKQPTTYTKSSQKPRIF
lpg2199	hypothetical protein	MYPNFLGMACLFHKRKNMLTINREKFEEIKNQLKEKQLVCNQIAQWKKTPLWLREMTHQPEIPPNFLNELRQIRDAIVSFEIDKNTLGLAVFYNELYKLLAPSYNVLTPIDTDHMNNHVLLLQRISNYAGKVDEHIKSLSASEVKHLDYAEFWSLLSETCSIQEVDRRKQAKEKFSQSIFLRLCQYNPKIYLDVATRLEEPAEQSNTLDF
lpg2200	hypothetical protein	MSAKQKELERLLELKKKQEEQQVLNQKDMLERIKLENKYMEFLQMTSQQMEEELKKRGPVKEVEVKGKDIDPIIADYKKLYSKESWYKEPETKDGKTHLTFPSQEAAGTFFKDQAEKNRSFIVIDAATNKVLAYSNGDGKLYNGNGSLYQGGDFKASKEDFTSFKMPEREEPKMGMQL
lpg2210	hypothetical protein	MTNDHYVSKKKMFAVVFCVFAPNEVLLANDTAVGGEGSLPIPVSQPHIKMVSELIRISGKNLNEPQMNGSWHYNCNFTFKNTLNKEVTISMAFPFPINDGNSEIALPAGQQTNVGQALVYDFLVTVNDKQVSAQRGNIAPDQNKGLYYEDAYFWKTTFPPLATVNIHHDYSTGATYDVMGYHWVRYVLKTGALWQDSSIGHTRLEVIPNTPTRLCSEIDQKADYLNPTPSGMSISGSRADRKYIWDLRHFQPQADLSLCLFTGISYVRYKVIYPWLNSDDALSKLARLSNKELRFLRNTIYAQYGRQFQSPDLQEYFSKKWWYVPNPDYSDRMLNEEDKKLLSMINQAK
lpg2271	hypothetical protein	MPSYNNARLLEKRLQNCDTQLNQFFNGQELSIKFLQQLNQIKYFYNSAFNKTENEDDGLEVVEEYENFISLVSQVKSGQINADKAFETIKDTTESRQADVIIANFFKVCELMFWATAAFFSYVACVSVGIPLTFCDPLLGIAVSLSTFLMAISTASKFLDCFDEFQSLDKINEHDQNQKDTVRFFSKTSNSTSSVRNKEAEVEESSQRLYPNLQTV
lpg2298	inclusion membrane protein A	MATNETELQVLIQHDSKSTITTSSLDSTDKDPKASTGTPEIESASLAQIVDTQKQLSQVKESLESIVDSIAENPSLITRAASAWGELPMWQKVTGGLVLTAPTLAVGLFAHIGVLLVIGGVTGLTYTAGAIVLDDHHTCNVNIAKRLKEGLFGLADLLQITIEALDAIRKKFAEEIEKFKNENLRLTDNIDRLGNEVESLSAQVELYMEIEKMLRKDTNEMEQTVKKLQESTTKQTDLLEKNQKELSKIRKEYEKSQLQLAEKIAELHEVRLSLGLEVQKAKTVAKTLEGTVQTLTGTVIADEEQRVSFQKKLDGFLNDKQLSFDQVAERICKAEEELKKVKEELRQSNDRYSELLKRQEQQVERLEKLGLHKLERIVDKENVKPSNDPVHSGLLSHGI…
lpg2311	interaptin	MILEEYIRMAKNKEFFDALEEIAESAKNDETLRNELAKVLDDILKTDPSDPEAFRKIVAEHQEFWDEHDPSLMEFNEGRFFGKSRKQYLKSDDFLNSTDPTYNFQKLHQFAAEQRVKLGLEKSDTDTLVAILKNNPEECRAYIESKKPGLGNFSEGNVHGWLKEEYTPTIPPKAINKSTGVLSDEAIKRIKEQARDLLLLKLINSSGNTQLLKDLRDAMSKPEAERAANALGFPTEGNGVLFLSREVVDALEERVEKLEQEAAKRGFDSYVQSLSHNALLAKKNGLESTTAAGFKNSLDEPYKTYLPESEWERAQGVLGARYLQAVLSSGTQNLKDALNAKDANALITELKKPALLGPHDYIDKAVTEENLGSLKKNMMKSFINNIKDETNLKALDALK…
lpg2327	hypothetical protein	MAKFTVGQDPVKGLTELKAYMEEQISKIKKATSEQEIDQLLVEVLNEYDDKMGSLSKIYKGGNEQVEQLKIDVRKLYEPLRDQFSYNHPQTLVGEFQTKLEEQHKRAEEEKRKLEKQREEQLKLEKQLEEEKQKLAKQSEVEEKPKLENQQEENITQALQKVDGIIQELTLKIDRVDQHQYKKAHDTANTLLQSLIAARDEYERDLRANEFSQELAGRKFKLACQDAVKIAKPVLEKDLGWGDYLKNLLKCLGNAVITVFTFGYQQGFFAYARPDSAKAVEKAEEDLGLRQAASSPK
lpg2391	protein SdbC	MPNSSIQIWLQRQIALRTFPPNREDWYVKNGFGNSEMSLEERFASFVEAIRQEDSPYHEQLSGIDFQRFEIEVTLANQKTCMTEVIGFQNNSNQSSSTPNEKFKAVGKGKHVIYFTGIGTQYQDCLIDIAKAVQITGAHYYAFEYPGMRKLGGEVLEVNDMVNTGIALANTLLEKGISIDDILFQGDSFGAAVAKKVSDQFKLQSNVTVRCILNNTFSTFQAAVEGNLGAFSTLRYTVRPLLRYTGWDIRPGEGYGQDTPYQIHVNHTGDLTLGAGHATLAESIESNSQLEHFVDPCPEEYRIKRDIYKQWHWASLSEQGITFLETKYGRNSDGQLDTHLADLYLLKYDTGLGVYESFICKYLEDSNDYIASHPQKLSLDELPRPLESETVSLRQLIVS…
lpg2392	hypothetical protein	MFYELILTRTSNLIQEFISIPHGVTSLDLSLNELGNISNAELIQAFHYIPDSVISLDLTNNHLCDKSGAELAQLLAAIPANVTSLDLSSNNLDRRSGAELAQAFAAIPASVTSLNLHCNYLGNNRGVELAQAFAAIPENVTSLDLSMNYFDLESSADLSQIFTSIPPHVASLNLSFNSLHEVPFEKLALLNDSLKHVQTVYLSFYSVKEMSKEQRRALGAAFPNAQKIILIDDYGHEIQPSITISNLIRELSGKADAPSLLNQCILFTQRHQKDSDNKIIPKELEESIRTFNSR
lpg2400	hypothetical protein	MNYKLTLHPGSNPVEEFTSIPHGVTSLDLSLNNLYSISTVELIQAFANTPASVTSLNLSGNSLGFKNSDELVQILAAIPANVTSLNLSGNFLSYKSSDELVKTLAAIPFTITVLDLGWNDFSSKSSSEFKQAFSNLPASITSLNLRGNDLGIKSSDELIQILAAIPANVNSLNLRGNNLASKNCAELAKFLASIPASVTSLDLSANLLGLKSYAELAYIFSSIPNHVVSLNLCLNCLHGPSLENLKLLKDSLKHLQTVYLDYDIVKNMSKEQCKALGAAFPNIQKIILVDKNGKEIHPSHSIPISNLIRELSGKADVPSLLNQCLIFAQKHQTNIEDLNIPDELRESIQTCKPL
lpg2409	hypothetical protein	MTNSNHLRNPVTKSLNDLCQDELSVIGSYLGAWNDLWSLTFTSSEMKKSLIHQQTDELWKFFFKEFFPYIPLPTEDFYKNFMKNYKIWYQTLYRVKQDPFFLMYLDKLKEDPAHLFRNDKEIIIAAIEKQPFLYKNFSRGYKEDEEVILCALKNNRFIIHDVPRTVREGFKEIADIKEDKARVDACDKLIDKLSPQRVSKIKSLDLFKSQFTLQAQNITKKSGEQVNNRQLQRSTAPITPEGISSLVHLGLFRDTQIQYEEKEESLHNKYRK
lpg2424	hypothetical protein	MKEIIELLATLDELQKPYIHRVKTRLSELLNLDEKENELMRIEQSTSRSWEEGATTDLRIGPIKSKKRIEEIRAVLITLSGAKAVKYEEGHNLENNAVEFIVTGCDVEQLEGFTPPNQEEMQNTIPVMTFIRMSVAGNREYVRGISFNSEKLDGENYLGSFKEGELNTSTQEWFSVLELLDLLNSESELNLIQIQNDLKSLLGVKFEVYFHSSSEEFPIDLRTGSLDLNEAGAQQLLRAMDSLVLLGCLKTESKELEDGQKVCVIKQVNPQELHKFSLKKEKNTNANSEMLSNIIELLKQSFPNNQVIRDLVVFDGREGRSMSRPYLHIRTQVYHQEATSDYKSAMIILKKLQDKTSKKISFDFRNEMVEMKDESRPVYMSSIENTIKSSQFIIDVAVG…
lpg2425	hypothetical protein	MDMREKYTGRSEPIINKPSDIPKGLVAKRKAELLLAKLEEAIKSQESLNRESESHAKEDNSESLKPRLTHPTSERPKINHRPPSSFSYTNSESTLFISPKEEKLEREEPSLSISSDKKKVVAKSSTSIWTELIAALSRAVDNYSHKRMEGTTPSEAYGWFSWLRHGKAGEDKAGELASEARGTSTVDSLLTLLHHFFADSNTRYNNHSLAPYVMDELNKLLIQYALKPFILSLGTQYDLNSWVHIKNQLSQLAGKEVSQERQSLVAPM
lpg2461	hypothetical protein	MDNRRKGMSQFNFFEKNQAFDENNFEQKLQDAINLIKQNQSFVARLVLDAINSNQVTLSTFYQLTPNHYQKTKTIMRKDYHTILPNTFPPTISAVRKIEKELDGIIYDNQHIYISSTKSVEEIAKTLIHEVCHFLNSDLYDKEMETEESKQVGYKDEVRAFTAEKMFEKNKGYLLRSDINQIHETVTELYPEFTDPENPMSGYIYSTFDSPS
lpg2464	hypothetical protein	MSIMGRIKMSVNEEQFGSLYSDERDKPLLSPTAQKKFEEYQNKLANLSKIIRENEGNEVSPWQEWENGLRQIYKEMIYDAFDALGVEMPKDMEVHFAGSLAKAQATEYSDLDAFVIVKNDEDIKKVKPVFDALNNLCQRIFTASNQIYPDPIGINPSRLIGTPDDLFGMLKDGMVADVEATAMSILTSKPVLPRYELGEELRDKIKQEPSFSNMVSAKKFYNKAIKDFTAPKEGAEVVSVKTHIMRPIDFMLMGLREEFNLYSEDGAHLSAPGTIRLLREKNLLPEEQIARIESVYNQAMSKRFELHAEHKKEHDEMPYSDAKAMLDEVAKIRELGVQRVTRIENLENAKKLWDNANSMLEKGNISGYLKAANELHKFMKEKNLKEDDLRPELSDKTIS…
lpg2482	protein SdbC	MAKTITKDSFFHSRLQQFVANSLFPAGAGDWYKNKGYGKKGEVDDEAPFRDFVEKQKTDKKSHYYKEFQGLDLSLKKVKTKLVSGESCQLEVMKCQPESNEPKKPGTGKHIVYFPGANTYYQACFRDISTACKETGATVHAFNFPGTGLSSGKVREANDLINAGISVVSSLIKQGVHPDDIILQGDCYGASIALEVKKQLEDQADIKVRAIMNNVFKSFKAAVCDMITQSPWLPNILKSIVKRLLEFTGWHVTPGKKYKHADPYQCHIQHLGDQTLESSTLSGKVSKYHHEIQTGQTKSQKRAPITDTCPEEYRKDRDELDRKHYVRVKESAKERLASKFGVDKFGRVNAHFADLCELEMLDGQSVYQGFVNDYIARSNAYIEKHPQKGIKEVQDDLRK…
lpg2498	hypothetical protein	MTITHTAAGGITMTLELIRNGETDTNDYEEHLDSFGYETLEKSLKEDAKSICQFFCNEELVLQGLKKLVTQFYQFNQPEKKTLMQFFDGWGSKNHFNQGTTSNEKIPFETSRNFHFPNHTPVLCGELTADLFNNVLLKQGYLSADIGAGPKHGKWAHSIQFFLLEEARKAGQLNLHANNVCEFIKKISQIHGQYESLSLWSILFDSFDETFTCPNLITQTLTSQWDNSKEAQFLADRLNSFQKKFEKAASTENNYNAYANKKYLSKIDKANYVKYKDKCAILWFAPQDKKTIPKPSSQEELKQNQLSFLN
lpg2504	hypothetical protein	MTKIYLLTAPFDEEAKTGDGQYAASLELGFAENYEHIPCKWLKKDKGDYSIPFPTGTTSIPEETIPSAIVLQPVANENTVISGYKLKDTVSSPEKAQEVNNKTVSPRTPKIIVKHDNSLQSLTIMDIYSQKPIQFDESKVDEIIHSLETKKVNLEKAIEDNNAELSKIKKQKSKLAYLTRLYKENKENIQDYCTLNEYIEAHLFNPKFLSRHEKALNNFKALKSQFTGPVNLKELEKLTDKLTGIKEYSYDFHSNSLPYDLEHDKSFRNFYDFDGLKESIESIIKELEVLNSIRQAVSDKYPNSFKALNETEEHDDKLKFINIIFNDGFSTTYDQQTFIKALSALDIEKAIDAYTNVKNKLENTQDIIANKEGCRNKLISELQTLIANKQEPYLSANEK…
lpg2508	hypothetical protein	MFSYLDKLLDGIFGYQKSDTSQLSTSTPPTLTTVPLKQEYFVKIGESETQDLGLLPVVSKRHNQSVPLEEIPFEDTRLELIELYIALLKQCVLDEKLKSIPAQYLISHYLFIKTLAANEGNKGRKDLYLNLSQKVADYLEKNESKIWSMAVECAKTSEYPIVDWIKKHHLHFNFIRAFILDYNKKSLTHNQRAFMQQFRDSAAFFFPDQVYLAWLTQSYEPGSILNPMYRESRSTHYYHANITDNLLLRTRPKQVNFGPQHFFQKGKGPVKNTYRFNINDGKLMRIQGRTLLFSTNKGNEVIAVKVQKKGEPQSALSNEFQMADYLLKHQRRLNLQSQLPTPLSQYSINRTEILEKCSKSPDFEKFKNLISDAKSLEIYVYKATPSYFTYLHDKQQSFS…
lpg2525	hypothetical protein	MKEKYKKSLYIPNELLLEIFADKNLDIQNIIVVSMVCKLWYELSLDNAVWRPLFIKRFSYSPTLANHSIFKEDYQKQLALTQAMKKKCESNHACRNEPGLLEAIREKNIPLIYALFESGHRIIIDSFPDGEQQFTEEMLGFLSECAELPSSLLARIFKRGFCTADMETSEFLALHFIVAEADEKLLQKIFRALGDDLLSVSRYCDLYDNNFFSSLLHFPVERFSLVLRLLYETLGKTKLSTLLVYQNHTYTDWSCIHSASRCGREYFFITLKYLKRQDYPVLLKKGLNDEDIPLFNIAYWGDKESLSHIINILGADATTFLKYKDNKGRNILLPALLSEDHSTVELIEKVMGMEFIDLLLMQDTNGRDILRRVMLLQEPTVLRRINTVLKLLRDYDCLD…
lpg2526	hypothetical protein	MRLFQYNQHICRGRFPVSNAYCKDFVVRNINTIFGLSENIMAYQLLLSKETLNKILQYKQNLEKGLATPGKFFLEELSKQEKSISEMDITTFTQLLIQSKKPQVFAESQVYHDGTDWTLEEESILGDVSVNMPVTMYNDGGHGSSFKNHPKPISGYLAYVPGALLASGSGPTSDMKEVLDNGKLNQDKLNALYERRLLPQLIHFNELARQNEKQAAITIPGIGTGCFSGAYYDVIKPYVRNALIHILEKHKDSLPYIDIIHYDPYMGDEPAEKKIGHMSFRVSPSGVVRGTTGQLDYPLGSNPDTHILVSIVAWDHFSWPGNDYWGGARQTDDGVKAASTDTMGQVTGATGVYDKKWGRYMPPESFTKDRKGMSDWGDYVRENGIVFNGPVLALDKSGK…
lpg2529	hypothetical protein	MVRVLNLQKGVNMFNVDNSGKGNCLYYAYSISLMYYLRAKNNVKITEDIFNKLGLKEEDRARLRKLLSKDPDRAFTRDEIKTIIEPILGRATRDLAAEHTKVEFKSSPHDTPLFSSLHYAVEFGFKRSLQINESELTLLIDNDFSNPDYTEAEIYKVSGLLDALQEYILTRTPSVIEEFNRQWENKKQELKEQSLTEKEIQVHQATILDNILRKETIDFLLAENEKHLDEYREHLRREFVWGSEETLMVLHRAIQGERMVRNHEGRIEPVYDHEIILHVHRNGASPSYQAGSPEMILNNEGNVHWTSIIPDAIFTSKLTDKEEKLLDMLERMQSEYGSKELGVEKYSSISDWLSDLMKQIELIKTSPTAVTKQKEIELFFQLLAKATPKLASEPALRMS…
lpg2556	protein kinase	MFDRNIKEIINELQEKDLLPDTGKIIGGPRNQFDKKGEIKQGYLFSVMNKEPIGKGGFASVYPVTLYRQGETGFAKKSTDHKKFVTKKFNLNKLKIKYTNLNIENLIEKEFEFCRKAGHLSIKPPVYNNNKCYLTMKRMPGMDLNRIFNKLMANPHYLTEGQRIKITYALLLALKNQVIDKGIIHRDIKPENIHVKVVDPVEVNIFDYGLAKNAGEDDNLFPGSESWAAPEMFIGLKHDSKADIFSMGRVIAFLWGESATNYLSNNPLNKSRNAAKNLNLPAQVKWVEPFLKQMLAERQEDRIEIDSAINQFKQLASINAPKLKLPQSSIKNHSNINNLCFFQNPTKSTNNSDLTQLNIQRDIKKDLQELLENLPGEFSHYRSNIIFKNTIGRFTTIQK…
lpg2577	hypothetical protein	MLVTPRFKIMVVVKKREETQKDERARAIENNPCSICRSLGLPFCRGHGGGSGGGGSDSASDDKVDDNDHQLLAPKNPANVTNIEQLLLHSGLWHLPEDEDFVFEFKDPLALVNMTLNMELGLLVLQGKRELGNEEQNALDELYEMIAKEFNLFKNSIKDPQVPLETITLAREGNSLTIKIPSPKYYDLFVQQLMDKNLLPSNTLALQHQNQSVKYPEKSKATMEKDLVGEEYKSSLPNPFDISRGPKLPDWI
lpg2584	inhibitor of growth protein SidF	MPRITENIETYVTHLLSDLEPVPSQNQHLAYGYPGERQVFKDPMLDGKQVVVVNSQYDKHGRPVTGQPDVIQEANNYIDNLVAAAKSLIDKDKKGEKDLRKNAIDEMAKTFKKSISETIPSDKAKADLFSSKKSSANKDFLEQLAKVEGSLQQFTQAVAKASGHKLKALDKEGHNIRSHNRDTLIHRFKAPNSKEGEEQFIMYIPCGRYTKRQQRLMGKDESEVNRDHDTTSHKRSDLVLGNSSMARMIAGTRHSDGTVTIHHDSFSGPGARMPYSDFKGADDYKKLAIKAVTLINQEEVIQTLAQRQIDRMTNEDLWNKIPEEYRPDELPPDAEKARAQLIKLYVEHNPLSVTECYTQVVTAGQRVAAENQKEQFEYVRQMMDAFDGSKAKITIQTGS…
lpg2603	hypothetical protein	MYSDFFFTIMLKYSTNMLELAMPKINKIVNGTDLTPHYLSEPNKEFKIYRYNNEVYAVRFENDEPMDYVLMWKSHKSEHTQNSEMIKNTEEDYKELGKGEQGTVYEKTEDKAMKVSRGRHPREFYEEINLHIIEQQFFLKYHGIQEHFVLGLWNIKNEENVYFYMPKINAIPINKKIDQPKIEEFVLALKELNDAGYWHPDLANNPYHISPQNLIATEEMVKTIDLDGGFRYDKGRVDELSRKSLVYGKDQWLYVYNFIYPPTDEEDHRIDWRVPIEKWYENNRDESLSDNPHTLLRFYHEGLISLPKKLAHDLHETILEELSQDKKFKKHSHEVGVNRFFSPKKQEIYEGLKGDGLKKVILKELRDSLAEIRTMEQLEEKKLEFLASPEMQILAEGQD…
lpg2793	interaptin	MNEIILHLMNEISTLTPPINPLNLKQIFSSTLLPEGKAPVEVESQLNLLLLIKKYVDEYSSLAEEQEEYKRKKHKLDEVMKKGEELQRKISDLAKKIEHAKNELNPLYKEIEPKANEVLSKQNPLAPPYKFPEYGEVQKSIVVGHYSYLFKTSKEIETTRAKLKLVLLKNKWNALMADLSQFGIQPPVEEDAVDSLQKFIAAVELEIKKLTRACEKWDELQKRFAKQLSATDINKKETELEKQIELLLKDLGRIETVVTNHSLAPDLKAELTRKFQESEDTQGLIQEYQNQIDGLLSNFNPSSWLSWYSDSNYSDNQQKLKNSVSFLQLLAQQKELKIKHHELVKQQELLIKAIPETPSNEEDISIYKKLVPDAIDLINEIPIESIPNFVLPSGLSYDS…
lpg2813	VipE	MPLTQTQRLINTYGASLKNGTISNEELIILLDPNTFTKSEGYVDPNAPVSDSNHSKMDAIKDFVLTIGPTLDSEILHQLTSRMIELSPPGDRNTFMRGSSLEKAFLAFEMAHYPTKAEEHFNSTRVRTEFPGENDIDNLKAVILNPIIAFFQSPPGTDEKLEKLIKLCTDYKEHLKPSLTDDANNLVNKKHAIVTNMLAALTDSTAPNNATKIKNMEQILTEENKATLKDRRDSFSGARFLESILHILSLGIYSKLTKGTFKFWKSHGEALSDNIEEVSKQQPGMK
lpg2815	hypothetical protein	MLLIIIFIWYKVLHYASMSKYTTMNIKNIPIKPQKIPYYLFLLLLTVGASLILGFLSFGGMYALWPVLPLAFAGFALSVAYEGEIYLQNIKGALNKLFKFNYLKNYLAKEYLLNHFPNTDEENCPQFFKDYKKQLTLLAEFGHKELNQDSKKRKRQIEKTLSDMEKWFALQLFSDKNNPSPNTSKYTIELLDWLALNKRDEWIKQYEKRHFQFHIVKGFSVVAGLFMGLGSTYLIVEAFTIIPFFATIPFTLWPIIILPMATVAGAAYGMLTYNAVTDMINNNTVVKWYNKIRNDLSQGLTVRNVFIATTAVFLVGLALALTVCTAGTWWTIATNARPLFDWMKKMPSFIMGIINPIITGASAIVFNIQNTAESLDMVDEATRSNKNVFQKIYEAISNG…
lpg2829	protein SidH	MKRTIETYIIYLKEDLKIADTCKTIKDGLLKSITDKTHFSEELATYFERDNPNAPFKVNTTDPTQVAVLKKLLNALENAEKSFRAIENIDISRDRYTAMIAKDAVMVSYKAVHEIYAALQLINHSNSDIQDIVGPHIQKLLPQMALASKALGNFAPEHPEESAGAVLAGVVNMLPTEKPTESESLGKLSNLIFELPHYFEELQKLIATGASGIATKSITSAEDYQSAMIKKANETKYYFEQLSSKSGLLAIPSYLSIVKRLIAHSTDLVNAGAPLTKQAYLDAVAKLEDIKHNILPQLISELEMVEESMGLKPGLLTDPALEQMNKYYTQLAEQVDNIAKAAGVLDTVSDYSDSIGGKIVRFLAGDSKKLDVGPKLTPAPDLGVLMDDVFIQKRRSNQE…
lpg2830	UBOX-containing protein	MGYRIEMATRNPFDIDHKSKYLREAALEANLSHPETTPTMLTCPIDSGFLKDPVITPEGFVYNKSSILKWLETKKEDPQSRKPLTAKDLQPFPELLIIVNRFVETQTNYEKLKNRLVQNARVAARQKEYTEIPDIFLCPISKTLIKTPVITAQGKVYDQEALSNFLIATGNKDETGKKLSIDDVVVFDELYQQIKVYNFYRKREMQKNQIQPSVSSGFGFFSLNFLTSWLWGTEEKKEKTSSDMTY
lpg2831	VipD	MKLAEIMTKSRKLKRNLLEISKTEAGQYSVSAPEHKGLVLSGGGAKGISYLGMIQALQERGKIKNLTHVSGASAGAMTASILAVGMDIKDIKKLIEGLDITKLLDNSGVGFRARGDRFRNILDVIYMMQMKKHLESVQQPIPPEQQMNYGILKQKIALYEDKLSRAGIVINNVDDIINLTKSVKDLEKLDKALNSIPTELKGAKGEQLENPRLTLGDLGRLRELLPEENKHLIKNLSVVVTNQTKHELERYSEDTTPQQSIAQVVQWSGAHPVLFVPGRNAKGEYIADGGILDNMPEIEGLDREEVLCVKAEAGTAFEDRVNKAKQSAMEAISWFKARMDSLVEATIGGKWLHATSSVLNREKVYYNIDNMIYINTGEVTTTNTSPTPEQRARAVKNGY…
lpg2832	hypothetical protein	MTNKTQELQRVIADMAVLIEQDAEPDPQLYAFFFQHPEISLELIHLINNLSEELVHDGPPIYSACVFALDICIAQLQAAAEANNKNATKLLSQLMNHLAEVIDTHKHSLSFWLPVLNAFYEVHVELTDDLKEAYYGLASQDDDAVEVDEQFNHLDSIKDLIHELSDLTLFDIAESFFAQSYAMPPDFFADLIVDLYSIEEGKDIALLVLLHPNIEVREIALSTIDQLINTITLTPASLSRLQIIKYWYPTHYHGMFDRWIKTQRKKGVTFETEASQAKITIKATEVDGSGSQGVFIHARKNKKNRLCGLLLKYDLGIKDAWITPEISAAEVTDYYHKAFEDSVTLREVDFSYFQTIVEHFLAITVEKSDIPNLHFLEILEFLGIRLKPDKLDLDCVFEQ…
lpg2862	coiled-coil containing protein	MSEQYWRFKLMTEGGCNQNEATRLITVLKRKLKPFPEESINKLFENDNFCNRLSSYMAYGFGAAEEWIKKQQILSNIQPLTSEQRVDITPEKDTVSDNKPNIFGAAITFGKSPVVKLLKQNAREICESILMDEPNLKQVEYIFRLLALQVQETYSGEQAEKLYECIRDKKPIPSKFEEILLPIVNRIKENHTEILNESKRNHLGVTIQLNDPYSFSTKNSFCIWFSNNPNSAMPKKIKDILEERAKQNAPGVTKLVYSRACLTKKENTNFVQWAKENGITLLDFDELKCQGEDLELWNLAQAELKAMREGKGGNPAAASDLVRWISGVIGDVPIAYVDADMPMLTGNKSIKSEEVYAGHPVLLNMGSALVKDGVNLPMENVAFNTDIINFTGECKDRSI…
lpg2884	hypothetical protein	MTLKQFATGVFYLPAAVFSGLTNLFLGSYAKDKRGNYIQDEDGNYVRNRGLIGLTLDAVKYLGTSVANFISSHQKAISVAFWSSLVVAGAAALTVAFWPAALAAVVNFSVFGVSIASVVGAGYAAQVAATAGVAAALTSTGVYLGATVVNAFNALRECISNLRSKKPSSNPEFTPVNDETFEEVRRNQFSGLSKGSEQQQTVQLSSSSSEEEEPVHTTKVFAQPKDVTPEVVENPTSTVSLTGSK
Dataset 2B - List of 98 non-Eblock containing proteins used to test S4TE 2.0 Eblock module
Locus tag	name	sequence
lpg0001	chromosome replication initiator DnaA	MSTTAWQKCLGLLQDEFSAQQFNTWLRPLQAYMDEQRLILLAPNRFVVDWVRKHFFSRIEELIKQFSGDDIKAISIEVGSKPVEAVDTPAETIVTSSSTAPLKSAPKKAVDYKSSHLNKKFVFDSFVEGNSNQLARAASMQVAERPGDAYNPLFIYGGVGLGKTHLMHAIGNSILKNNPEAKVLYLHSERFVADMVKALQTNSINEFKRFYRSLNALLIDDIQFFAGKDRSQEEFFHTFNALLEGQQQIILTSDRYPKEIEGMEERLKSRFGWGLTVAVEPPELETRVAILISKAEQSNIELPYEVAFFIAKRIRSNVRELEGALRRVIANAHFTGKPITIEFVHEALRDLLALQDKLVTIENIQKTVAEYYKVKVADLLSKRRSRSIARPRQMAMALS…
lpg0002	DNA polymerase III beta chain	MFELTIKKEDLLTPLLTVSGAVDKKQSLAILSHFLLKLSDGLLYITATDLEIEMSAQVACDSKNTSGSITVPAKKFIDIIRSLDENASPSIVFDKALVTIKQNRSTFKLATLPAENYPSSEDECNDVELTIPRLVLLQLLQSTHFAMSQQDVRIFLNGLLLEFDSNIISAVATDGHRMAISRYSCNNIAQTKLLIPKKGVQELLRLLNCINDEQVLLAAGKSHIKLITNQFVFLSKLIEARFPPYTKAIPREQDKCIVIDCASLKRALSRIVILAHEKSKAVLLHLQQGQLTLIANNNEQEEAIETLSAETQGDELKIGLNATYLLDVLTHFSEGQIRLSMSNTESSILIESLVNDNYQYIIMPMKI
lpg0003	DNA recombination and repair protein ATPaseRecF	MILSEVRIHNFRNIASTSLILNPNFNCITGPNGGGKTSLLEALYMLSCAHSFRSREITPIISYGQNQLNVFAHAYDESTISVQKSITDGTQIKLNNQFCCTTSQLAYALPCQVIYSDIFQIIDAGPSVRRSLLDWGLFHVKHDYLKIWKDYKRILSQRNALLKSRATYDHFIPWDQQLSQLANQLDKARNDYFLQWQPKFYQVLSDLTNISCTVEYYKGWDRKNAGQNMEELLQKSFDSDRKKLYTQYGPHQADLIISTEQYRVKHTLSRGQQKIILIALKLAQGQLLDKDCLYLIDDLAAELDDYHQRNLIKYLTQQKGQFVITNLINNNNYDILPIDSGLFEVNCGAIKNL
lpg0004	DNA gyrase subunit B	MMSVDASYDSNNIKVLKGLDAVRKRPGMYIGDTDDGTGLHHMVFEVVDNSIDESLAGYCKEIFVTIHSDESITVKDDGRGIPVDIHKEEGKSAAEVIMTVLHAGGKFDDNSYKVSGGLHGVGVSVVNALSEELHLLVRRHGKVYEQHYRHGVPESPIAETGEANSTGTQIWFKPSAETFSNIEFHYDILAKRLRELSYLNSGVCIHLFDERTQKKDTFHYEGGIKAFVEHLNKNKTPVHPVVFSMTSEKDGIVIELAMQWNDGYQETIFCFTNNIPQRDGGTHMAGFRAALTRTLNNYIENEGYAKKAKVSPTGDDAREGLTAVLSVKVPDPKFSSQTKDKLVSSEVKPAVESCVAEKFNDFLLENPTAAKSIVAKIIDAARAREAARRAREMTRRKGA…
lpg0005	peptidylarginine deiminase	MNMNTAPKQYGFYMPAEWYPHERCWMAWPCHHETWSKIGLDKAKMAYARVAKAIAQFEPVTLLVNPGDEDSAENLCKGHNIEIISLPINDSWTRDTGATFLINNERQLAGVDWIHNAWGGNYADCSLDNLIASHLIKYTEAQYFHAPLVMEGGSFHVDGEGTILTSKECLLNSNRNPHLSQQEIEQYLINYLGAERIIWLNMGLIGDETDGHVDEIATFIAPGKVLCLITKDKEDPNYHRLQENFEILKSSKDARGRTFEVYTVEQPPATYLNGERLTLSYINFYMANQGIVMPAFGYESFDRLAYQLFVQIFPGYQITQIDALDVFSGGGGIHCITQQQPKSHKLVE
lpg0006	arginine decarboxylase	MNNNTLSDDNLYNIENWGEGYFRINSKGNIEISKKPGKPGVELQTIVDAADRAGLHLPLLIRCSDILHDRVHRIYQAFTQAREDTCYAGNYQLVYPIKVNQEQSVVRELLKSPDNQIGLEAGSKPELMAVIGMLGDHQSTIVCNGYKDTSYIRTALIAQQMGHKVFIVIEKKSELDIILKESARLQIKPTLGVRIRLVSKSAGKWENTGGVKSKFGLNAKQVLELILQLKANDMLDCLQLMHCHLGSQIANIHDIRHCMQEVARYYIELRQLNAPIGTIDVGGGLSVDYEGTRSNKGCSMNYSLVEYATHIMLALKHLCQEAEISEPDLISESGRALTAHHAVLISNITDVEIINKAPVLPEISEDDSHVIRDIYDTYQAITDSSPTEIYNYAAHSLNE…
lpg0007	hydrolase	MGTLMKENKLTVALVQEQWYENPKEHQDKLASGIFSATQQGAKLVCLQELTLSPYFCTRSDVDPAPYMEDIATGPTAQFVSQMAKSNQIHITASLFEKAGYNTAVAFNPQGELIAVTRKQHIPSGEKYHENFYFKPGNSNYPVHTIAGHYLGLPTCYDQWFPELSRIYGLKGAEILVYPTAIGGEPTAPGFDSQPMWQKVMVAQGIMSNTFIIAVNRIGCEDGLSFYGSSFISTPMGEILVQAPRNEPAVLVAELDFSQRELWGRLFPFPQQREPETYHELVKSR
lpg0009	host factor-I protein for bacteriophage Q betareplication	MSKNHLLQDPFLNELRKEKVPVSVFLVNGIKLHGIIDSFDQYVVMLKNSITQMVYKHAISTVVPSRMVKIPAEESSGEEEGTVAD
lpg0010	GTP binding protein HflX	MGIRVVFERPQGGERAVLVQLALPGVDADKALAEFEELALSAKAEVLDCVLGARATPDAKYYVGKGKAEEIAHLVNMLDADLVLVNHELSPSQERNLERLFGCRVVDRSGLILDIFAQRARTFEGKLQVELAQLQHLSTRLIRGWTHLERQKGGIGLRGPGETQLETDRRLLRERIRYINKRLEKVRCSRDQNRQARRKASMPTVSLVGYTNAGKSTLFNVLTGEHTYVADQLFATLDPTMRKLELPGSSAAILADTVGFIRDLPHHLVEAFRATLEETQQADLLLHVIDISDPNWRETVFEVQKVLDELKVNNIPVIQVFNKIDLQEGWQPKIDYTEDSCKVWLSATTGAGLDLLKEAIATQLHGMILIEDIVIKPDQAKLRAQLYQLGAVLKESVDE…
lpg0011	thiol-disulfide oxidoreductase	MKRLIPTFIYLLVLAITPFSTHAEALLKDTFGHNIPFSSLKGKWVFINYWASWCETCVDEIPEFNRFYKNHKNEAVALYAVNYDALPLPEQKLLIKKFNINYPNLLKDPAQDLQLGDITGVPVTFVFNPKGQLIKKLYGGQTAKTLEKVIAENRTS
lpg0017	hypothetical protein	MELLMRRWLGVQAFSYVELRSIQISTVFAFTIFVQEWLRYPRAGWTGFAVMMIYAGFDNGTTIFRTYHRFLGVLLGLFTGYLLWFVGHLDYRTLILIMPLMVFFAFFLVGRAYSVPTVFTVNVSVLGSGYFSTEDTLPVTYFIIDYTLCTLIAFTIILGFEYFWFRHYGLMQRFIKSTQAEVIDDLYRLVRLLNQGKIKKTEWFQACIKLTDSLFEVNKLITNSQFLISSEHAVGDEFNQFVELANRIFIGLKALYMAYYTKHYHTFDYYQLFQQVQKDLVRLKDFVAGEQTIDLSEGVKHATSG
lpg0018	outer membrane efflux protein	MLRPVKIILLSVFLVGCYSEPYHRPHVEVINKWSVKDKNVKNIDSKNIPYIAWWRDFKDPTLNQLIERGLISNTSLGMSRGSIEAAEGELKKIRYQWVPTLDLMTGYSRNPATGFPGVLIVFIPNYTINIINQIREQKRAKYTLAQVKAEDDALKLTIISQIAASYFTYLAEIERKEFLQTLANDLTQLAKVASKVYQGGLSSEIEQEELYSQVNLIQGELEVTERNIVISRNALRYLLNQNPGEIKTVKKLLQLKNRKLIPGSLPLTVLENRPDMQVAENRLRASHEGIGVAESNLLPTIQLDYIGGLAAGDSRYALPKKTVKFNDQLLKAPIIDMPVLGAVAKAKGVNKVSYYNYIDTLQKALRDTTNALSENERLTNKLKQTASAQKHLAKAYNLN…
lpg0019	hemagglutinin/protease, zinc metalloprotease	MCMLKKTMFFILSISASSIFAADNVDLYQAPLNSINKYPILQTPKNAIILKSSSAVIDNSLQKLNQTKEDNQMIVRYQQLYKGIPVIGAQVMITKGTDSGVQSNDNAEVNGHLLENIELNTKPAISAQQAKEYAKKSYFQFSSQSNIQQETAELQIRPDHNNQLKLVYLVSFKSVQQDGKPDWPFFVIDAQTGALIKQWNNIKNYLDTGPGGNEKVQEYWYGKDGLPALDVTQNGSQCVMENSKVKLVNLHSQWDWENTINTPFEYVCNNNIEENINGGFSPGNDAYYFGHVIVGMYKDWYGLNALQHSNGAPMQLVMRVHFGQNYDNAFWDGQAMSFGDGLDFYPLVSLDVAGHEVTHGFTEQHSGLEYHDQSGALNESLSDMAGQASRAYLLEKNPQ…
lpg0020	hypothetical protein	MAFFLITLCILILSFFCLAVMVLKFIQQPSLPLSFSQYVKLMCSGVIAFIADTVGVGSFAVNVALAKLLGTFRDDELPAVNNGAQVLPGAIESLFFIYMVDVDLTTLLTLVTGTCIGGLVGGFVVSQLSKQAIRLAMICSFALIIVLLIAHQLRLLPVGGDLTELHSWKLVIGFFAMVVCGSLTSVGVGLFVMVQGVLFLMNVSPVVAFPIMTTAGAMQQPLTTLVFLQKNKIPLKKTLILSFSGCLGVMITIPIFTKLTITWLHFLLLFILIYNFLAIGHTYLRSRPVKQYVQSSVKLAAAD
lpg0021	hypothetical protein	MDEQISKSQKKRDAHYLQDIGIKFIDLSASKLDSLPLPDNLRQAIVDARSIKSHGAKRRQAQLIGKLMRAADFEAILAAYEKILEEESSVTASFHEIELWRDRLLQDGKDALTEFIDAYQPEDVQQLRQLIKKALDDQMKEKNTGAAKALFRYLRSLIK
lpg0022	23S rRNA m(2)G2445 methyltransferase	MNYSLFISCSKGLEYLLEDELKGLGLHVTQVSPQGVYGEASLPVIYNLCLWSRLANRIQLILFSGHATKEQAVHQLCTDFHWQTVFTHDKTIAIEFHGASEQIRNTMFGAQIVKDGIVDHFRRLNGSRPSVDKEKPQILIHAHLKNDILTVSFDLVGYSLHQRGYRKKAGKAPLKENVAAAMLLRAKWPELAAQGYSLHDPFCGSGTLVIEAAMMAAHIAPGLLRQDQSLQYWARHQSSLWEKLRTQALQQVKPLAVKLIGTDADSKIITLARSNAERAGVLPLVEFNTLSLNACRPGTKRGLVVCNPPYGERLGEVTQLVPLYQELGTTLHTCYQGWQAAILTSSPVLAKALGLRADKQYTLYNGPLECKLYCLTLSAANKLKNTPNAPLSDNAQMLF…
lpg0023	hypothetical protein	MKSFIEQAQFYATYHQNQATRYTHMAGVPLIMLSIMIFLGFVKIVIPGVYATDLACLATLATLIYYFLLNWQLALALTPILIFLLWLASWFNYDGPTKFGLWVFIITFVVGWGLQFYGHFIEGKKPAFMVNFTQALIAPLYLTAELFFMAGLMNSLREQIYGNEEVNTEEISKTKTKSKS
lpg0024	hemin binding protein Hbp	MMLKTQLTAFIGAVILAGSSLANPIKPEVCPSVPSIQSEGMSMSSEILEGMYITYNLSHYNTSSSWVFIVGPIAAENDDMALAESNKLLSTMSGSPHPEDDGEGNWICQYTTKSKDIIAFAIEADDMLSPLKMMRYLRTIR
lpg0025	palmitoyl transferase	MKRLISCLTIICALNASAAAETTSNPCSRWISFLKPVCQRIHQTWTEGHDDMYFSGYAWHNRYVYSNEKIKSYNETAWGGGLGKSLFDEKGNWHGLYAIAFLDSHRHLEPAVGYAYLKTASVNKDLKAGLGYSVLVTSRVDYDNVPIPGALPWAALFYKRITIAATYIPGSSREGHENGNVLYMLGKISL
lpg0026	amino acid permease	MDLFRKKDIKGSLDNESHLAKCLSVFDLTFLGVGAIIGAGIFVLTGIVAATISGPAVIFSYVVAGFACAFAALSYAELAASIGGCGSAYGYAYAGFGELIAWIVGWDLLLEYSIAVSAVSIGWSGYANDFLMALKIFIPTHLLHGPADGGDLNILAILIIAVLTTLLIVGVKSSSRFNNIMVLVKLLVIFIFIAIAFGEVKVENWSSFMPYGWAGVMKGASIIFFAYVGFDAVSTAAEEAINPQRDLPIGIIASLAICTVIYILVSGLLTGIAHYTTLNVSSPISHVLLVLGYKTAAGLVGVGAIAGLTTVMLVLFYGLTRVFLAMSRDGLLPRFLSKTNEHTKTPIRIILLCGILMASLASVTPIGTLAELVNIGTLFAFIVVCGGVLYLRRTHPDME…
lpg0027	low affinity inorganic phosphate transporter	MDYNTIFILFVIFIAFVFDFINGFHDAANSIATIVTTGVLTPRQAVLWAAFFNFIAFLIFNLTVAQTIGYGLIDTDLVDTYFILAALMGAIFWNLVTWYYGLPSSSSHALIGGLAGAAIAKGGLSSLKITGFAKVAAGIFISPVLGLLIGLLFTHIFSLFLRHKNEEELNTLFKSFQLISSALLSITHGGNDAQKTMGIIAVLLFSASWLDGVFYVPFWVVISCHGVISLGTLAGGWRIVHTMGTKITKLNTLKGCAAETGAAITIFAATEFGVPVSTTHTVTGSIAGVGLISGIGGAHWKVLRRIFYSWLLTIPAAALVAAAIVNIAPTA
lpg0028	ubiquinone biosynthesis protein COQ7	MINDFKLHTNQVNIETLHFIFKVSMRTSSFLDRLIGEVDSALRTLVLPQKRITTRQSPAENLADTVLSAQEKKHISGLMRVNHAGEVCAQALYQGQALTARLTHIKEQMASAAAEEVDHLAWCEERLYELGSKPSLLNPIWYCGSVLLGALAGLAGDKVSLGFVAETERQVTAHLQRHLHYLPEKDKKTIAILKRMQEDEEHHAHTAMEAGAVELPYIIKQLMNAVSKLMTQSSYYI
lpg0029	sensory box protein	MIGVGLNWHMIDKMRKSKKPHPLNHIASGDNFSHLNLLERGLISQLIELSYDENTLHTLSLSGLKLLGKHPLLKNTITAVWHHDGSHINILASNGLKFDAPKELEKFLAVVSDWHFLKIYKTKLKKHCEEKLKQRIDICLDKYQDNLFCISFWFDSIDCNFEMLMPFFKDILGLLNLSLAKLMNKKREKLLTTILEKAGDSVEITNEEAVIQYVNPAFENITLYNAREAMNKTVASLLRSPVEDAQLFEEINQTLKSGNTWKGQIRSRKKDGSYWVAQTIIVPVMDDELGRITQHIAIKQDITEQVHRFNQLKISEERYRNLMNAVADGIFIHNLQGAFLEVNEAACLSLNYSREELINSYVWDIEVGFSQESLNQLWENVQKGPINTEGMHRRKDGTT…
lpg0030	hypothetical protein	MLCNGSLLMKTEALLSWLNVESNESYDSIRIKYQLRLEALEKEERIKKMGGINPFAPKIPLNNPRIITSKEIQEAWAAIDSLSKYQQFKGLVAQEENLSTIPNKKMDSKREETKLTHFVRERAQGPRGRRLPAHLQAKIKRVSLDKPHSKLITEGAEQQINAILDKTTLSVSDLQSAVYTAVQNYTNYHMKSENKNNPKYNRGQGDGFFSFFRHGSFGITTANNLYTSINAKNATLDETIEKLKDFLGHSSRAYHHHSFTSYLADALAEKGLLTSHPASRYKQEDVVNQLDQWIAQNSTVNFLK
lpg0031	hypothetical protein	MSFVLSIGQADSLRLLVYTGWQDGMLIVPSQQVHQPGKM
lpg0032	leucine aminopeptidase	MVFKSRLVGIILLCFSSITGWCLSQSPEEDRIIVSNCLYEQLKDKARLIAQSDHFSFIAIPIDENITNTLQKMRPVCGNYLNAEPYIQQTSNRFLDSKKLLDKLTSYHSISTANPYPINHEAQVHSLFEQIDPAKIWQTNQHLTSYINRSAKSRTGVEAAQWFKQQFDTLAQDYGRKDVESYFVKTGNKFIQPSVVTVIGKDKPGEAIVIGAHIDTLDGNMPGADDDSSGISVELEMARVVFSSNFELNRPIYFIAYAAEERGLIGSGYVVQDFLQKKIPVKAVMQLDQAGYRANAKDQTIWLLKDYVDKGLTEFTAELLTRYVKTPVGYTKCGYACSDHVNWTNEGFKTTYPSATTLDDDNPYVHTSNDTLDILNLEHMVNFTKLGLAFIVELGLN
lpg0033	hypothetical protein	MGWTDRFWNAYRVVTNTVIEGAANSLNAAGSLACLLGGAGVSLSYSMSETIKAGYFGSVGVAGTVNLDVTAVEFNYGFNQTIPFRRDLLEKSDGGSYALNDFANPGTIFMISSLAILSGTTLRTFGANLKKWQQNREDKHHFITKYGTDLEPPSYKEYLHVNAESFFNSLAIASFSSLLAKNVLDFSIKDLSKYHFTYPFNGTNITGSVKTPDYTGPVTSEFFPLDFFVSQNTTIHTDYLNLIVNEKVKANAMTNVTYGGGVHLEPNHQSSAPLLAASATIGISTYLAGTFFGKKILRERDERLQHSRSSSYSIVSGTFWDNKHDIEAKGDTKFEHSHSLQ
lpg0034	hypothetical protein	MKLHSISTNKMRLIISMWLIYLFAVLFLVASLFTMLILMMEYTLVCKNKQYHLAKECVLHSRIYNLYHSSTELGDLKAAVVKSSRSSKGNTLYYVDLLTAQGPVNLTGSSSSGRDDKEIAANSINNYISNSLETTFKVSYPASWWMYGLSVFFLLVGALLLTVRGAITDFDRILKTIVIKRKGLFKTEETKLSFSDVDKIIVEESLGSRGTKTYRLAIALKDKPPIPLVTTYDSSFAKKEKIANQLNQFIHEN
lpg0035	hypothetical protein	MSKFFTLLICISIGLLSFPTYAQKTIRLSPNETKTLKNSTLWTLNATCNVQSSTKVNGKIKIIVLKNNGKVNGKSLSTGQGTFITIKNNSSISVSAESGTQINLINLGNQELQAVCST
lpg0036	hypothetical protein	MNYQYSPNLKKKFLLALTTLFIVQMFYFATVRASTRDTQLWTLMNAIGPINKQHRKIRYWLEIQDRVGENISQLSQLILRPGIGYELLPTTTIWLGYDRIYTAQPFANPPVNENRVWQQLLWSKEYTRLRLTARSRLEERFIQRATHTAWRYRQLFKTSIFIPKHPKYAAVISDEAFFHLNDFNLQRNQGFDQNRLFVGLGYRTSKNSTIEIGYLNQMIKRVNNPDYRGDYLSMALLLTE
lpg0037	arginine ABC transporter substrate-bindingprotein	MVRLRIYLCSLLLVIPFYRAYALNLTIGTLSYNPPFETQVNDSSKKNEFYGFEIELMDEICERINAKCQYKPLLFEQILAEINSGAINLGIGSINITPERSERFLFSLPYKASYHQFLIPSNSNIKKIDDLKGKTIGIHLGSPTADYLKAYFNNNIQFKYYETFMDLLNGLTDPQVSAIVTNSDQAQYWASSTPDCKLLGDSFPFGVGFGVVARLDQAELIEKINQALIEIENDGTYLKIYNLFFQP
lpg0038	ankyrin repeat-containing protein	MLMAATIPHIETITFTDWFLAIIDTPDIPIDEIEIRVAEGFKRKLTERQFQQLTELIHLISFIKHKKISNPTLALRIYVDENTSSLSRTALVEAVRMLPPEDNKTYELAAYLAQKNKLERYTNITKVPPLQIYQGDGVFEQYDEWILLFELFGLTQATPSDFIPAIAHLLITKNLGIPDLRALSKFMSTTHKLGILSQSFMNNMTPHLCNGQIIEKYESLLLKLQINDLLTEEILEVIYPLLNQPDALDAFFSLYHEEPSHDSALSFLREILPSFCAMSLPSKESYDDQVPTNTPLHLAVIESDKGNLERTLAFANRNLLIKCSYENTALLLACKLADKESARLILAKMQELGCDVNQRDHHGMTALHWANFYHFDELIRELEIAGADPQLKAANGKTC…
lpg0039	hypothetical protein	MLVFGLPEILIVLAIALLGKEVYGLIEQKIKNILFKEKVSKTRYRLGLVFFAFPLVIGLLEVFVKEITLAYGSYYYWVEIIWTTMFALSFFICGKQFWDKFKSLFIYDSYVVFEKNKK
lpg0040	hypothetical protein	MDPITHGALGAACAQAALGKYDKRIPWQAGALAGMAPDLDVFIRFSQEPLSLEQWHRYLTHSLMFIPIGGLIVALFLLCFSQYRQYWKITIGASLVGYATHCLLDSLTSYGTVLFWPWSDSRISWDIISIIDPVFTLPLLLGTAWSVIYQNQKAVIASLFFCILFLIFNTILHNRAVDGIHQYATTNNFKINHPRALPKLASSTYWRIIAKQQDCLIIAEAKTSLFYPTTIRLIRQALSFNESMIPFALSSGQKSDLATFHWFTDGFLIVANKNPLILADARYTIDDNPIFSLWGIEILPGQEHINKLSLPKINEYCESPDSERYKEDGLN
lpg0041	hypothetical protein	MILLNLMGFTMIRTFLTAFLMLLCSLALAQEKVVTQFFKEVNSSIAISEGKANIQASRYRVVDIDVNQLYAELENAPHRDGISTGIPLQLELPQPDGTVKRYQVMENSTLAPELSTKFPEIKTYDAYGIDNPGELVKFDLTPQGFHAMILSPGRDTVFIDPLIKGNTQYYMIYYKKDFITSKKMKCGVKNQNQPLINAASKRDFTDFNPCVLKKYRLALAATAQYTQFHGGTVPQALAAEATTVNRVNGIYEIDMAITMQIIANNNLIIYTDPNNQPYTSGDPDKMIGENQANIDKEIGAANYDIGHVVDAAGSGLAQTPSVCINGEKAMGVTGQSNPVGDPFDVGYVAHEIGHQFGANHVQNNNCQRNNPTAVEPGSGSTIMSYAGICDPNVQDDSDP…
lpg0042	hypothetical protein	MNRYSIFFLIFCTLSLESHASLYSGINLGINAVKINKNLVYPLEDPVPTTSSFNSAYTDFHGQLIAGYDFSLAPKISAAVEANIDLFTGKAKHRITEWYFNEDVYAEEQLKVGYSLFLLPTYHLNNMVQFFVGPGVSSSRFNIAFSNTAGNVGVSDSLNEWLTGISIKAGSITKLTRNIDLLLTYQFTQYNSVTGVQMEPLSEDTLRGSYKPNVNTVLIGFKVHPSDEITKDT
lpg0043	hypothetical protein	MVSYLFSEVHFTHALKKVLGISVLVGVYSAIIYFWFEQDNLHSSNWLSYSQSVFGIILGLLLVFRSNRAYERWWEARTLWGQLVNASRNLAIKIRILLSPNADEAKKFSELINTFCEVLAIHLRQKSTRDDFKKFLKMVSLPNHVPSYVAQELYRELSEKTKASKRLNLWLLDNEFSKFMDICGGCERIKNTFISLSFRVFVKHVFIIFILFLPCSLIDTLGVWAIPATIIITYLIIAIEGIARNLEEPFGLTEDHLNLSAITESIRESVNEVLLGQKSNEESNSI
lpg0044	hypothetical protein	MDSLDLDFYAITRAFLFFSLIGLMVVLEYFFSFHRLGKAGVRRRRVSNWYLGIVNIIVALPLSTLTTAAYCEYYQIGLFNLLKVPFGLVFILWFIIYDLYVYLFHRLSHATFLWHFHKIHHSDKSLNVTTSFRFHPVEYILFNALKIVLIILLGPYFFVILVSDFIQAILVFWGHSNIALNAKLEQALSRIIITPRYHVMHHTQDECRRNYAAGLTLWDYLFHTQTEPLWNKDDINKLTLGVQTKTNWSEFKNLLLINKLIHFLGRLQFVYFKFPLITIGVAVIFGIVEFY
lpg0045	hypothetical protein	MKSTNNMQKKETDKPTSEQEQKKEVRRNNAPDFIPGASPYYNLYCFFYKLCHGEDTSRQHQPATSFQHGK
lpg0046	hypothetical protein	MNCFPFFAKKNKKNNEEKAEKIFSVFPAGTSINKTTVKEICFTDIFCDTHPFVWYYYPEHNLAIWTSRLAGTTQEYPADYLLNQLAKIPGITIDQGDAAIKDVSTFLQGHQMIPIRNNESWRYIKSSSFSMS
lpg0047	chloramphenicol acetyltransferase	MSSFKFLNEQDMKPTDKKHWSKIEYLHQSVKNPNIHIKGKHSYYSDAWTGSFEETVVRYLYGDEYSLQTWQPQWQIDQLYIGDYVCIAAEVIILLGGNHNHRADWFCLYPFADKYVEAYQGKGDTIIKDGVWLGMRAVIMPGVTIGEGAIVAASSIVTKDVEPYSIVAGNPAKPVKKRFAENVIERILALGIYSWSEAKFNLLKDYICSNNIDKLEQASRSYDQNHTIESK
lpg0048	acetyltransferase	MINIRKLRLGDESTLETFLKSHADESMFLRSNLYHSGLSYHDKPFHGDYFAAFDTNKKISGVLAHYWNGNVIVQCPDFNVLTALVGTFQKAATREIAGILGEDQQADVVMKQLQLEHVDYAVNYPDGLYALNLQNLAMPGNQDRYQLKVAKDCDKCLLYEWLRAYQIEALGAEEDSSILKEQVESEVKSTLEGNDRWVLEENGTPVSLCSFNARLSDIVQVGPVWTPVTLRGRGYARTVVALSLSAAQKSGVSRAVLFTNNQAAVRAYQAIGFNKVGNYRLAILKKPILLTR
lpg0049	amino acid transporter permease	MIGNKTMDMDIKHKPLKRELSLFGATMMGLGSIVGTGVFVSIGIAAGVTGPSVILAIALAALVATCNAFSSAQLAANHAVSGGTYEYGYRYLHPAFGFTAGWMFLCAKSASAATAALGFAGYFIHLSGLETVPVIPIALAVSITLILLVLSGLRRTNTVNIIIVMITLITLTVFIISGLPDFMQRGTANLRPFFPVSKQEGLSHFFYATALMFVAYTGYGRIATLAEEVKNPGKFIPAAIIITLMVSAVLYILVGLVAIGAVGVEKLAQVTETNATPLESAARAIGIPGLSVLVSIGACTAMLGVLLNLILGLSRVALAMGRKGDLPKMFCYVSETRHVPVSAVIGVGVVIIALVLTGSVETTWTFSAFTVLIYYAITNLAALHLPKEEQLYPPLFAIG…
lpg0050	hypothetical protein	MIDGIMVLWFILLMLSLAFIAYDVREMPIDWVQKLGWVLVVAYTGPLGLFFYFLTCRSPGKGLHALYTKAQWKQAVNSEVHCLAGDATGIIFAAIFLSFIDLSNGVELILEYISAFFFGWVIFQAGMMRSMYSSYGEALRKTFFAETISMNFVMMGMIPVMMILMNTLDYGRNPAHLQFWFIMGMATVVGGFLAFPINNWLVKKKLKHGCMTLPEGDEQIEGHMTHHHGGHEEHLQAQAKRIGSKVIHGHTHEMGSLPLNIQLKYIGISFGVLLIIVLIMAFFVPLKI
lpg0051	hypothetical protein	MWLDYLHNINSDPNLLYLFIRTFIIYVFAIFIIRVGNTRFNFETAFDYIFVFVIGAVLSRAINGNSTLISAMAGSSLLIFLHWIFALCSFYSHGFGKLVKGKSVLLIQDGQLIWSALKRHQVTEEDLRQVFREKLNASDLTTVKEARLERTGRISFITYK
lpg0052	2-methylisocitrate lyase	MSNFRYSQGKKLREALMNEKPLQVVGTINAYTALQAKRAGFHAIYLSGAGVANASYGLPDLGITTLNDVLEDVRRIMSAVDLPLLVDIDTGWGGAFSIARTIKEMIKAEAAAVHIEDQVQAKRCGHRPGKALVEKEEMIDRIKAAVDAKTDPDFVIMARTDALANEGLNKALERISAYIEAGADMIFFEGVRKLEEYQALTEQCNVPVLANITEFGVTPLFTLEELEEVGVSLALYPLSAFRAMSAAAEKVYDTIRKNGSQNDILAEMQTREELYQVLNYHFYEDKLNELFMKEKTT
lpg0053	transferase	MLNKLMWLTGKAQEDWIEKILHLRQKIWPDYQRIKNDTLFKLYSHYPLYQWLSHYNGEVVAVINSLPVALDQSLDNLPQEGLNWVLSHLESTTPLTQSNYLAAVSVTVNPAYQRLGLSKLLLNRLKASAQEAQYKALIVPARPSQKENYPLISLEDYLKWKRVDNTIFDPWLRVHAQLGGKIAYPCQRSRVITANVAQWEQWLGHPLLQTGQYLVKGGLNPITINKEKDIGIYIEPNVWVIHDL
lpg0054	hypothetical protein	MELILILTGGFMIREYMDKRNNQFTTEILNYFSDLKKFSTSYLEWITMEHYQFSLNNTRFLMNSHIQTKSLSDPGVSEELLANYNEEKNHAQMYRHALKKIGLDVTNRIPYVATRQFFMRLEALIVINASKTLGVMYATETAAIFEHILFKEISAELCQRKGLDFENSRIKQFHDLHLDGVEQAHKDELGKFMDHTLAEEHVDPNIFLQEKEIMDGAYAAIDIMEDWWSGLINAKAHLLEQAHA
lpg0055	LysR family transcriptional regulator	MINFSQIQVFITIVESGGFIAAGEKMHRSQPAITNAIKKLESSLGFELFDRKVYRPQLTAKGKAFYQKAREVVAQFMQLENSAETLRSGVETQFSIDLDIALPLPGYAPLIQSFIRQYPETCFSLSNNTFVRCLERLERRECHLCIAASHIRSPQIEYLRMPSIRMIPVASRDYYDQHKERINNPKLGIYCMQIMIAGTQQELYQLKIEPLSHSMPKWLVGDMYIRKQLILSGMGIGRLPDHLVEKELAEGSLVQLNTRDYVAVTMDIYAMRLNNQEHGMVSNYAWQSLKSYAEDTVSPDLK
lpg0056	hypothetical protein	MDIIMIDFKINSQPDDESCGPTCLHAIYQYYGLDISYEEVANQVESFLSGGTIAPMLGKHALQLGFKVTLYVNNLQLYDPTWFNSDGSSNTDVLREMLMQQMRYKRNQYLARGTHAALDFLTLGGAIYFRCLTAEILKEYFARQIPILTGLSSTYLYNCSRELFNNEGKSRSDPIRGLPCGHFVVLCGYNQKHRLVVVADPYKKNPVSGDNYYTVSIHRLINAIMLGVVTRDGNLLIIEPKNS
lpg0057	MerR family transcriptional regulator	MNNKKIGEFAKLCGVGIETVRYYQRQGLLHVPLLNKELGAEKIRRYGDDDISRLKFILLAKKAGFTLKEIKELLEFDAKNDRERVRDMAERRIEKLNLKINELTEARNRLSLLVTKCIETSSSPCPILMTFEKS
lpg0058	hypothetical protein	MNHTSIKKAVLYRMVIEHHVCPYGLKARDLLRRQGYEVEDNWLTTREQVEAFKDKHNVKTTPQTFINDERIGGYDDLRRYFGKKVRDPKEKSYRPVIVLFAITALMAMAVSYTRFANPFTPHALSWFIAFSMAVLALLKLQNIESFSTMFLNYDLLAKRWVPYSYIYPFAEALAGILMIAGALNWLSIPIALFIGTVGALSVFKAVYIDKRELKCACVGGDSNVPLGFISLTENLMMIGMALFMLLM
lpg0635	melitin resistance protein	MSFQTDKEIQQKFFNYTLFVLVVLLICRLIANYFFPLFDTTESRYAEIARKMLETGNWVTLQQDYGVPFWAKPPLSIWLSAFFMQLLGVNEFAVRLPGLLLSIGVLWLVWGVAKKQSGSMAALFSLLTLAGSLYFFLDAGTVMTDPALLFCITLASVSFWHAMVYENKIWSYAFFAGLGLGLLAKGPIAVVLVGMAVFFWVLLRNEWLNLWKRLPWVKGTLLLLLIAVPWYVLAELRTPGFLNYFILGEHFHRFLTPGWSGDKYGIVHHVPKGTIWLYATAGVFPWNIIAGGWLVKHGKMLPSLCQSGDGWLSYLTLWMITTLLFFTFASNIIYPYVFPSLPAFALFFAEILNRLNLELKHLKWIFISSLLCGVLFLAVAFVFSVKPNVVPNTHKPIIT…
lpg0636	thymidine kinase	MSNTNEDGNNQSMAKLYFYYAAMNAGKSTVLLQSSYNYRERGMQTLLFTPAIDTRFQYGTICSRIGLSEQAYAFNNSDNLYVLTQEFQLQTQKYSCVLIDEAQFLTREQVYQLTEITDQMSIPVLAYGLRTDFRGELFPGSQFLLAWADELIELKTICHCGRKAIMNMRIDENGQAVVEGEQVLIGGNESYVATCRLHYKRGEAEVTFPRNKLFNKDTNAF
lpg0637	major facilitator family transporter	MVSHSVAVESRTFVPRGDFMAWVVCLSAGLFFLYEFFQLNIFDVINQSLREDFHIDATQLSWMSSTYLWADILFLLPAGLILDRFSTRKVILTAMFVCVVGTIGFAVTESFFLASFFHFLSGIGNAFCFLSCVVLVSHWFPPRRQALVIGSLVTMAFIGGMMAHTPFAYLNDLFGWRRALLIDGVVGAFLILWIYMIVQDRPEESPSHKLTNEGQILSSFMKALSNKQNWLAGLYTSLLNLPIMVLCALWGASYLQVAHHLPDIAASNVVSLIFMGSVVGCPLVGWLSDTQGRRKPLMIFGAIATLITTIPLFINVVLTQTSLSILFFALGLFTSTQVISYPLVAESNQPENTGAATGIASVIIMGGGGVAQVLFGWLMTHHAGTNVTAYTVSDFQFAM…
lpg0638	major facilitator family transporter	MQVVDEFKAFDVKASLMPWLVCFAATMFFFYEFIQGNMFASIAANIMQDFQIQADKMAYLSSIYYLANVIFLFIAGMVLDRFSIKNTILIAMFLCVISTFILSYSDSFYVALFCRFVTGIGSAFCFLGPVRLASHWFPPQRMALVTGAIVTVAMTGGMLAQYPLTKLVLYVGWRQAVQDVGILGLAMLVLMFFWIKERPQVAIKKEGKPINVLVAARKAYLNAQNLRAALYTSLMNMAIAVFGAMMGTLYLEQRLGISPDQAAMINGMLFFGAIIGSPLMGWISDKVGLRVLPMKGGVLASLLILLGVLYLPVSVTMMAVLFFLLGLFTSAQVISYALVAESSPPMMTATAVSVVSILTQGGYLIYQNLFSALLTNYGDVRLINGVPVYLLEAYQHAAI…
lpg0639	phosphopentomutase	MTGRVCVLVMDSFGIGASLDAARYGDAGANTLVHIYEACKRGECDIEGVRKGPLMLPNLAGKGLYHAAMASSGLSFIDLATLAIPSGYYGYAVEQSLGKDTPSGHWEMAGVPVTFEWGYFPDKPYCFPEELISEFIKQCNLPGVLGEKHASGTIIIDELGEKHIRTGKPIVYTSADSVFQIAAHEEAFGLQRLYDICKIARNLVDKYQIGRVIARPFTGKPGSFKRTGNRKDYATPPPEKTLLDFLKEDGREVIAIGKIADIYAHQGVTQEIKADGNMALFDATLSAMKTAPQGSLVFTNFVDFDSSYGHRRDIAGYAHALEQFDARLPELDALLQPDDMVFIAADHGCDPTFPGSDHTREHIPVLVFGPQVNSKFIGRRDCFADIGQSIAEHLQLSSP…
lpg0640	ATP-dependent protease peptidase subunit	MEQFHGTTILSVRRGNQVVIGGDGQVTLGNTVMKGNARKVRRLYKDKVIAGFAGGTADAFTLFERFEAKLEMHQGHLIRAAVELAKDWRTDRILRRLEAVLAVADSKASLIITGNGDVIEPEESLIAIGSGGPFAQAAARALMENTQLSAKEIVQKALTIAGDICIYTNNNLTIEELNDEGK
lpg0641	ATP-dependent protease ATP-binding subunit HslU	MMKANNMVMTPREIVQELDKHIIGQDDAKRAVAIALRNRWRRMKIKDPVLRNEIMPKNILMIGPTGVGKTEIARRLANLAKAPFIKVEATKFTEVGYVGRDVDSIIRDLTDMAIKQEREFAMKKVEHLAEDAAEERILDVLLPPARGTLTPGEKNTTARQVFRKQLREGELNDNEIEIEVAATPVGIEIMAPPGMEEMTSQLQSMFQQVGSYRTKTRKMTVAKAMKILREEEAAKLINEEDIKLKAIESVEQNGIVFIDELDKIAKRSDTVSGGDVSREGVQRDLLPLVEGTTVSTKYGMVKSDHILFIASGAFHVAKPSDLIAELQGRLPIRVELSALSVEDFVRILTEPSASLTLQYSALMETEGLTLTFDETGIRRIAEVAWQVNERTENIGARRL…
lpg0642	hypothetical protein	MKTQRIIHPNIDIRKFPEVNTDFSMTDISMGDLHANALLFLNILVRQGIIAISPENYAKFAEIYTLPELQADYWGTEAPVFSAENKQERLEEIKKQYNALIAQIKIINTKKLIRLIGDELVDRGVIDYFILKLLQALYDQGADFEILLSNHGIEFVEACELFKENGNKLVAKRLGNIQHGNSFHALQEAIAAGAISNEEVLNIYHQVYKKHLKIISYSLDPDANEIKVFSHAGIGLNHIRGLARKFKVPYSEESAVDLAKTIDAINKKFAEKASSGEIHTLYTHDMMYRGYAGEHLNSTDEVVAATVWGREYGDLIRTSKKFKITFIHGHDSYDPEKVEHVTLNNQLGQFQNNVGDLYLYATNGMRAVPTQYLNPDKKIQGSREKDRPDKPNDYVVKIH…
lpg0643	ribonuclease BN	MNWKDKVKTTFYSCDRFVRFVIQHFIQDDCTYIASALAFTSLLAVVPLMSVGLAIFSSFPVFQGLAEPVQNFIFDNFVPATGKIVQSYLQQFTSQVSKLSIWGIVFLIFTALLVMFTIERAMNKIWRVSSSRHGVSAFLLYWAIISLAPVLLGLSLAASSYLFSMPILADHRAPYTILHYSPFFLSLIGFTFLYVVVPNCPVKIRHAFWGGLVAAILFESAKHAFAYYLIRYNTYALLYGAFATVPIFFIWVYWVWIITLLGAEISYAFSVHHQRRGGKSLDGFSHALLWLHQLWLAQQHGKGLSFNDLVDASKQPFAVDVDEMINALIYHELIHATADGHYMLSRDLSHVTLYDLTQLLPYRLPTHLELQYSKASLAEQWRAAFKRHNEELKKSLDIN…
lpg0644	hypothetical protein	MLAESVIGIVRAVNGLLEKVNVQGQASLVKSGARLEEGDVLTLLSGEAYIQFIHGFPEALALEKPVKLDGVSPTLQYGAEDLKEQMVQEAIAKGIDPSVILDVLGSAAAGAVAVGSGGDAFIIDPLFGFGHVTAGYPTGPISFAYEADTQQLFWFVPEETGAIAESELTTEPEFTPQIPQFTTNQAVLTVFEDALPSGIPDSAGQARTASSSLSTLLTSSPDVAASFAFNTNLSVLPTLKSGGIDLDYNLSPDKRTLTASIPGGGDVMQFELTADGRLTQTLMDSIDHPTTDSDDGEWMRLDLSPLIYVTFTRTSDGTVLESRTLPANAVVAGIQDDVPIARAQLTNNEILLDETVGVKVGDADAANDDFNPTITTDPFNNTYGIPIGLVQNANLLDNG…
lpg0645	hypothetical protein	MSGLGGNDTLDGGSGDDVIIGGLGDDILTGGSGADQFVLVKGQGGASAGAAPIDTITDFEVNIDKIVINGNNITGVSVSTPVSNTYTITVNYSDAATEHFKMTLSNGALLNDSGKTHLNGVVISGGTATIDGTIVGAVLYLDLNANNQEDEGERLGITDQYGHVEWVVDLSKFDVNGDGQYVIGEARAVQTGGFDIDTGLSYEINLYGPVGSAVISPLTSLLQAQLEAGMDYETANAALVARLGLPEGTQIISFNPITGSGEVLAQNAGVMTAAIQFAEIAAIHYSTDEGHVSFVVFEAISKALLELPEGVVADFGDEGFLQSISNYLGLDALVTSDMIDYMATSQKALEASILTLAPGEDALTAISKIQHVTQGIYAQAIEMALIGYLPLDALKNMSA…
lpg0646	trp repressor binding protein	MSNPYILVLYYSRTGSTAQLAQYIARGVESVSGLEARLRTVPPVSTTCEAVDKPVPDAGAIYVSLDDLRHCHGLALGSPTRFGNMAAPMKYFWDGTTSLWLGGDLVNKPACVFSSSASMHGGQETTLISMMIPLLHHGMILLGVPYTEPALTSTQSGGTPYGVTHVAGGDNENPLSQDEITLAKALGERLGRVAMGLKV
lpg0647	hypothetical protein	MASCEWIINESKEANFGDKRLDKRYGDILSGLLSSPNASIPTTFQSWNETLAAYRFFNHVNVNPESILLPHSEATLERIKAEKIVLIPQDTTEVDFTGRKSLSGMGYLSNERSRGLYLHPSIAFTPERVCLGVVEMQHWIRKEIGTRNSRKGKSIEEKETYCWLKGYNAANKIALAVPDTMVVSISDREGDIYEVLEKLPSEENKAYWLIRCQHDRAVLNEETNQFELLLKKEVSKACVLGTIEFEIPAGTSYRNCKKRHTRKARSVRQEIRICSVSLRPPRRKSKKLNVIEIQVVHCKEINTPEGEQPVEWFLITSVPIKTLDRAVEIVNWYLCRWLIEMYIKILKSGCKIEELRFETYEATLNCIAFYMIVAWRVFYLTMLGRTCPDIDCTTVFEDN…
lpg0648	exodeoxyribonuclease III	MKVISFNANGIRSSARNGFYDWLVGQDVDFVCIQETKSQVEQLIPEELYFPRDYFCDYFDAEKKGYSGVAIYSKYKPMRIVKGLGFDYCDKEGRYIQFDYPKLSVVSLYLPSGTSGDDRQEVKYAFLEQFARHLMNLKNEGRELIICGDYNIAHKKIDLKNWRGNQKNSGFLPEERAWMDELFGSMGFVDAFRVHNQEEEQYTWWSYRARAWEKNVGWRIDYQVITPGLTEYVADSRIFREARFSDHAPLMIEYKGDWCV
lpg0649	hypothetical protein	MNTRETGVFKLASWNVNSLKVRLEQVLQWLESSQVDVLAMQETKLTDDNFPVASFIDKGYHVIFSGQKTYNGVAIISRYPMTDIQTDIPELEDPQRRILAATVKGIRLINLYVPNGGELTSDKYQYKLDWLNKVTRFIQHEISIYSKVAVVGDFNIAPEDRDVYDPVEWEGCVLVSPPERQAFMKILELGLHDSFRNFAQEEKAFSWWDYRAAAFRRNRGLRIDHVLLSHELNALCRQSKIDKEPRKAERPSDHAPVWVELEL
lpg0650	50S ribosomal protein L31	MKASVHPDYQTVKVTCSCGEVFETRSTLCKDLNIEVCSMCHPFYTGKQKLVDTGGRVQKFRDRYNMRTGQAKSKE
lpg0651	malate oxidoreductase	MDNEVIKQRALDYHEFPVPGKLSVHLTKSTNSQDDLSLAYTPGVAAPVLAIAEAPENAYRFTSKGNLVAVMTNGTAVLGLGNLGPLASKPVMEGKAVLFKRFADLDVFDIEIDAEDPQSFIATAKRIAPTFGGINLEDIKAPECFEIEQALIEQLNIPVFHDDQHGTAIVVAAGLLNALELQNKKLSDIKIVCMGAGAAGIASMRLLVALGAPKSNMLLLDTKGVIHSGREDLNPYKFAFARNTSCRTLEDALVDADVFIGVARPDLLNAHLLSLMAPNPVIFALSNPDPEIKPELAHSVRKDLVMATGRSDYPNQVNNVLCFPYIFRGALDVRATCINQAMQIAAVEAIRQLVHEPVPQVVKDNYPGVVNWDFGPDYIIPKPIDPRLKERVPAAVAKA…
lpg0652	major facilitator family transporter	MHTENRTNYAMIGWLLCGLGAIFYSYEYLLRIAPSVMENALRTHFNLSASGFGFLSSIYYLAYVPMQLPVGVLLDRYGPKRLLTMACLVCVIGTYMFTGTTIFWVAATGRFLVGFGSAFAFVGVLKIATLWLPENRLAMISGMTSALGPIGAMLGDNFLELFIVKMGWVKTLNMTAAFGIVLTLVLWVGIRDRKGHHRQSGTVPTLKKGLVDLGIIITSRQIWVNGMYGCLVYLPTTVFAELWGIPYLHHAHGLTTQAAGLANSVLFLGFIIGAPIMGYISDRLYRRKFPMLIGASGAAIVMMMILYLPGLNESNIQALMFLLGLLYSAQAIVFAVGRELSPGEAAGTAMAVTNMIVMLGAMFLQPLVGHLLDFSLSTHLSDTTGIVVDNMSKLYTVDD…
lpg0653	major facilitator family transporter	MQKHLNNMTTKKQISYGVLVCFIGAVFYCYEFILRIVPGALQTELSTALGHISATTFGQISALYYFAYSPMQMPVGMLMDRYGPRRLLTFACLCCALGSWMFTLTWSIVLVGIGRFLVGFGSSFAFVGVLSLALHWLPRRYFSLVAGLITTLGMLGLVYGEIKITEWSEVIGWDHVLMHIAMIGSALCILTFFVVRDGPEGYQPNKYPWPEFFHNVLKVLTSHEVWLIGFVGACLYTSLSVFGELWGKTYLEQAHHLTKVEAAKTVSAVFLGWAVGAPLAGYISDITRRRLLPLVIGAIVSLICISFVLYCPGLSYLTLNILLFLYGVFSATEIIVFIMAKECSGAKLSGTVFAVTNMIISLAGAIFQPLVGKLLDTFGDSGIVAGEHIYTVDDYQVAL…
lpg0654	DNA adenine methylase	MVKIRPFLKWAGSKYNCLNEIISSLPTGQRLIEPFAGSGVVFMNTSYSSYLLAESNSDLVNIYRILQLNGESFIDYCQQYFTPEANCKEKYYELRSEFNNLMDSNQKSAVFLYLNRHGYNGLCRYNSKGKYNVPFGLYEKPYFPRKEMMLFYKKCLSAQFIHGDFRNTFALAKPGDVIYCDPPYVPLTENNQTLPYNQKLFSLEDQIELAELAQETASKGIPVIISNHDTEFTRHHYKKAQIKSFYVPRWISCRSKMRLPVKELVAVFNCSS
lpg0655	tryptophan/tyrosine permease	MYLYCFGLYFVINSKLIGGILLIVGTSIGGGMLALPVSTAEVGFANSLFFLFFCWLVMTAGALLILEVNLRLPAGSNMISMAKSTLGLPGQVIAWITYLLLLYTLLAAYISGGSDVFSSLLHKAHIDLPNWITSVIFTAMFSLIVYSGIRSVDYVNRGLMFGKLGVYILLVIIISPHVSTAGLTGGSAKAFTGTLMILVTSFGFASIVPSLRDYFNDDIRSLRRVILFGSLIPLFCYIVWDAVIMGVISREGENGLLSLMNSDHATSGLTEALSQSVSSQWISGFFGFFTSICMVTAFLGVSLGLFDFLADGLKLKKSGNQGKYTLALTFIPPLAVVLFNPGIYLHALSYAGVCCVILLLLLPAIMAWKGRQTCSQSPSETHLIPGGNPALSLIGFIAI…
lpg0656	tryptophan/tyrosine permease	MRSRFIGGILLIVGTSIGGGMLALPVANAATGFWQSSLFLLICWAFMTFGAFFILEANLYLSRGKHMVSMAKATLGDYGLLTAWISYLFLLYTLLSAYISGGADVLNSLLSKANWHLSDWQASSLFTLIFGLVVYGGIHSVDVANRALMFGKLAVYCILVIMIAPHIEFHYFQHGDYQQIGGAIMILITSFGFAIIVPNLRDYFDDDIKTLKKVIFIGSLIPLICYIAWDAVIIGSLPSAGTSGLESLMQNPRTTSALASLLTDKVENTTISALFNFFTSICMLTAFLGVSLCLFSFLADGLKLRERGRHGIGLFVLTFLPPLLIVIYYPGAYIYALRYAGIFCIILLLLLPALMCYFGRKRYKSPFWVPGGKISQFAVIIISVVLLTHEFIALFK
lpg0657	outer membrane protein, OmpA family protein	MRNLMRCLIMIKSLIKGVDMSRKLAKTRILGYGLMICFLAGCFHPPYNNFQPDRRAVKRVGVDTGIGAVAGAIASGTASGTLIGAAAGGTVGLVASIYRDSKRKIIRDLQKQDIQYVEYGDTRTLIIPTDKYFMFSSPRLNEICYPGLNNVIRLLNFYPQSTIYVAGFTDNVGSRSHKRKLSQAQAETMMTFLWANGIAAKRLKAEGYGDKNAISDNAIIHGSAQNRRIEIQWFTSPAQPPQPQMAYVK
lpg0658	HlyD family secretion protein	MENYMSKKAIAISIVIALFFITAIWFAYNFVKQEENQNWLTLYGNIDIRDVSLSFRVSGRILSMDVDEGAHVKKGQVLARLDKDTFIANLETAKAQLEQAIANQKNASRTYKRREQLVDNGAVSKALFDDAVAMKDSSSAEVAVAKANLEKAQISLNDTEIHAPTHGTILTRIQEPGAIVNIAEPVYTLAIDNPVWVRTYIDEPFLGKIYPGQEALVYTDSNPEKPYKGHIGFISPQAEFTPKIVETTQLRTDLVYRIRVVVDQPDNGLRQGMPVTVKIHLKANS
lpg0659	ABC transporter ElsE	MNSSKPLVSINGVSKCFPGNIDPALDNVSATIFEGQITGLVGPDGAGKSTLMRLICSLMMPTQGTIKVDSLNTRTDSEKIHAITGYMPQKFGLYEDLTIIENLRLYAELRNLHGEKREEQFSTLLKFTALEPFQKRLAGNLSGGMKQKLGLACALMGEPKLLLLDEPSVGVDPISRRELWTMVQGLLGRGMGVVWSTAYLDEAEKCDQILLLNAGKPIYHGKPGDFLQKTKDRTFQICGVSLLNRRQALMNALNTPEVIDGVIQGKNIRIVIGDKKIKPSLDSITREPGVHFQEVESRFEDAFIDSLKTKISGRSLLAEHIAEKPHSDKPIIEARKLTKRFGSFTAVSNNEFTIKRGEIFGLLGPNGAGKSTTFKMMCGLLQPTQGQAFVMGLDLKTSS…
lpg0660	ABC transporter permease	MNIRFLKALVIKETLQIIRDPSTILIAFVLPLILLFIFGYGVNLDTDQVKFGLALESYDSSTVSLSQSFSSSRFLDVSISTNRQAFRYGLVNGTIRGFIDIPQRFTADSLSGNPKPALQTIVDGSYPQVAGFAENYALGALQTWISSQAYEHGQLTVKSGINLEPRYWYNQELKSRNFLIPGSIVIVMTLIGTLLTSLVIAREWERGTMEAMMATPISIVDIILGKLIPYFVLGMGSMFLCTIIATWYYGVPFQGTLLALTLVSAVFLVAALGQGLLISTLAKDQFVASQLALMSAFLPSFILSGFIFEINSMPKWIQLLTHLFAARYFVTSLQTLFLTGNIWSLLIRCLFAIALIGFAFFFITAHKTRKRLD
lpg0661	ABC transporter permease	MAKLSPTTRIFALVIKEILTLFKDPKGRIVLIAPPLLQLLIFSFAATMEIKNISIGILNQDFGKHGYEVIQRFIGSPTFSKVFFIQKQSDIKPIIDNQEAMVVMTIPQDFSRKIESNSQANIQLILDGRRSNATQIVNGYISSIIENYNQEIQKTHGAIMTPPVMVTRSWFNENLLYLWFTVPSLVCILSMLISLVVTALSVARERELGTFDQLLVSPLTPYEILIGKTIPAIIIGLAEGLLMWVAAVWLFDVPFYGSPLLMVYILFIFIMSTVGVGLFISSMCKTQQQAILGVFIYMVPVVTLSGYASPVENMPEWLQDLTWFNPLKFTLIAVIGIFLKGMSALEVFITTWPLLLVGAVTLFIAGWFFKQRME
lpg0662	major facilitator superfamily multidrug-effluxtransporter	MDRKLALLFSISCLFGCTVGPDYQRPDIKIQEKWPTSKVEKKISSSAPVHLTWWKAFHDPLLDRYINEAATNNLDIKAAEARIRQARAMKQISLANFYPQINGSASANSLQISKGTLEGIFANSPTYTLIDRNQWIYNLGFDAQWELDLFGKTRRKVEASKASLEEAYESRRTILLSTIAEIARSYIELRGAQQLYGIAQKNVELQRKTLALVRQRYKAGVSSEVDVSLAEGQLKNTESVLPNYITQIQVNAYQIAVMLGKDPQTILKDIAKMQSLPKPPQKVPMGLRSDILRQRPDIRATERQLASAVAEIGVAVADFFPQFNLSVSNLAFQSTSVDTLFQSSSGFWLMGPQVSLPIFRGGQIRANVESKKAVAQQAAIQYKKIILQALQEAQSALAR…
lpg0663	soluble lytic murein transglycosylase	MPNNCPQALLRGIMKRLLIFLCGLLCSFNLFALSGQAYMDRFNRYLAWYEHLPINPSPEFLEFVKESTPLANKLRDKWLYELARIKDWANYNKYYQPTNDINLRCFAQIAKFNLGLYKEAIAGSIPIWLTGESRPQACNTLFALLLKQDNFDQKFITQRITLALDKRNVLLARYLLKQYKTPHDTEIKNLTSVYENPSNISKLNPGKLNDYFYLYGLKRLVSINMDKAVKLWQEKKTNIMLNERQKQDFLAHLALYKAMRNHADAQEWFAKIKPEYYTDVLVDWQIRFALKNKNWKQVEKLINNSPNKEMPCWQYWLARSLEEQGKKAEAIKIYEPLAKNRHYYGFLASKRLKKRPSFDNEKPTTNTEILKPYQPVIEQIKSFYNSKQLLQASRLLNDF…
lpg0664	D-ribulose-5-phosphate-3-epimerase	MTFQILPSLLSADVTRLGEEVDTVMKAGADFIHFDVMDNHYVPNLTFGPAFCDALIKKFPNLPIDVHLMTTPVDTLIEAFAKAGAKRISIHPDATIHLDRSLQLINNLGCEAGLVLNPATSIDTLTWCAHNLKFVLVMTVNPGFGGQKLIPEVIPKLSKIRQQHPNLDLCVDGGVTPQNIASLAHAGANQFVAGSAIFNSSNYSETIKRMREQLASI
lpg0665	transmembrane protein	MKALIAKTYLLADKIFDFLAPIFILLTRLYLAQVFFLSGLTKISNWQATLSLFQNEYMVPVMSPTFAAYLGTACELGFPILITLGLGSRLVLFGLFLFNLFAVFSYKFLWTPDGAVGLTDHMQWGIMILMLLCTGPGKLSIDYLIRRFYLKLDN
lpg0666	hypothetical protein	MRNTLLETIQKEWIAQFKEEALSSPLKNRFARSNFDGISVYMESHHATLFNHLKSTFPLCMRLVGENFWYALLHRYINNCESTQYDINQYGDSLPQFIANFEPAKELPYLQELCFIEWHWHTLKLASPAKSFDFESFACLDEISFQALCFHLTPNLKILDSQYPIYQIWAMNYFQQDKQIQISGCPEKVVIYQHNDLPCIMLISEEEYIFLELLSSGKQTPWQKVVTELSKWISEEKIGDTLTKALRYQWINHFSLEAI
lpg0667	hypothetical protein	MYSNHSIDQAAPYSGCSGIGLRLEHIDDILKEQPTVDYFEVLADNYMKQSGVQFKQLLKIAEFYPVSLHSVGLSIATSSEPDYQYLRQIKDLAHCLNSKLISDHLCWTHANQFFTHELIPFPYTEETLSFIIEKTNRVQEYLNQPIMYENVSRYVTYRQNTLSEAEFLNELSTATGCGILLDINNLYVNWYNHGDDPDKYLHSMNTKNVWQMHLGGFSKQEGYLLDSHSDKVYQDVWQLYEKAQNLFINTPTVIEWDNDLPDFSLLYEEMCKAKTIIKCVAERSMNHYA
lpg0668	hypothetical protein	MLDFQWLPYLLMQILQMIWKNAKAWPKLEKMIVVQLNMPVLANLKQMVQQLTGFICPKVLVKSWLTAQLKAN
lpg0669	hypothetical protein	MNNISKITMAAVMAAGLSMATIPANADTPNDMEKCQGVAKAGKNDCGTAQHACAGQSKTDGSTTDWIYLPKGTCEKLVNGTVKS
lpg0670	hypothetical protein	MHLCLILNKSQQKEEEYCIMAKDTKMINLALQGGGAHGALAWGIIDRLLEDGRINFDAISATSAGAMNAAVLAYGFATGGKEGAREALHQFWKMVSDAGQIYNPLKKTPLEELLGIGIENSMSFFMFDLMTKILSPYQFNPLNFNPLKEILEKIVDFEKIKSCKSIKIFISATNVRTGKINVFDNKKISADAVMASACLPFMFQAVNIGEDYFWDGGYMGNPAIFPLIYNSECRDILILHINPIYREHVPDTAAEILNRVNEISFNSSLMREMRAIAFVTKLIDSGWIKDEYKNNLRKLYLHAIRADVSMESASVASKLNPEWSFISHLYEEGRKKGEEWLKSNFKHLGKVTTIDLDEYL
lpg0671	NADH dehydrogenase transmembrane protein	MQQEDQAQIPQNSRSFSRNTARCFDTFMDTVDFLGRIGWPVIDLAFRIWIAQQLLVSAILLTNHWDTAVYLAKNEYPVPWLSPEWEALLGILAQFVGGISLLLGLFTRCGAAFIVGFAVMTQVYYQPIDLNLLWIALMLGYVLRGPGPLSLDNLFEHGFSRSPLPFAMLIVTFVDRTREFFSSLYLFSLRMWLMISLLLINQHIQLISSDALPLLMPWLPLNSASIVFNNVSLFMAIFLGLGLATRVVAIFGLIVVLLSFTPGVTGFYLYWMMVMAILFISGPGILSLDHLIFHALKKHYPQLSGKPAFSLDGLPRVVIIGAGFGGIACAKALRHMPVKITLIDRHNYHLFQPFLYQIATGSLSPADIAISIRSIFLEQFNAEILLGNVTDINKEERFV…
lpg0672	acetoacetate decarboxylase	MDKYLSANSLEGVIDNEFSMPAPRWLNTYPAGPYRFINREFFIIAYETDPDLLQAILPPDMELLEPVVKFEFIRMPDSTGFGDYTESGQVVPVRYKGEEGGFTISMFLDCHAPIAGGREIWGFPKKLAKPKLFVEEDTLIGILKYGSIDIAIATMGYKHRPLDAEKVLESVKKPVFLLKNIPNVDGTPLVNQLTKTYLTDITVKGAWTGPGSLELHPHALAPISNLYIKKIVSVSHFITDLTLPYGKVVADYLA
lpg0673	signal peptide protein	MNKRPIQNTAVIAAALGAALASIYTYTDWLSSDDITVKRERCYNVVRAGKNDCATSQHSCAAQSTADRDPEAFIMLPKGLCERIVGGRSG
lpg0674	adenylate cyclase	MDSYSKLPLRIRKEIEAQQYTGELLVAGVQLGVIVLLSIINIFSSAGYSPGAPVQSSSLGLWLFAILILLRLWFVYTNQLNPIFLGFFIVAEMALLLFIIWTYYLQFETTPTINLKNPHINYVYVLIALRALRFEPVWVILSGLTAAIGWGIITWQTLSSSGMNVITWDYVTFASTRSVYLGAVFDVILSVLLVTAIIALVLTRAKHTLFQAVEQTSAAKDLSRFFDTSVVEKITTSEKSLQAGYGELRQAAIMFIDMRGFTKASVKLSPSELIGLLAEYQRLLVPIIQKNNGSIDKFMGDGILASFGAVTPSNTYAADALRTVDEIVASVDVWSENRRKKEQIVVGVGIGLASGEVVVGVIGYENRLEYTVIGEAANLAAKLEKHNKEEKTQALTTRD…
lpg0675	hypothetical protein	MKPGSLPVMPRMKQIQEFFLNTVFNQQDTAIFEYFCPDEISNQFRFDIYRNTILQNLRHSLEMTFPAIWKLVGKGCADGLALHFIQDKNNLPTTNCLDDWGEKFPLFLKNNPTVSHLLYLKDIAEIEWLKHLSYCSRDCIVFDPQKLQKHLNDRVEKLILLFNPSVFLYSSSYYLKSIFDLIENPMETGSIDFQQIPSYAVISRQKNQTVIHWITHDLFHFLCHIKAGASLGFAYENTLENNPDFDLLSALQFLLRNELLEDSFINPNYHLTHTNNCPE
lpg0676	hypothetical protein	MHKIINGTMTGIGLRAPHYAQILEEKPDIDWLEVHTENFLAEGGPLLELLDSISQHYPLSFHGVGLSLGSAEGVCIAHLNRIKTLIDRFQPALLSDHLSWSTIGNTYLPDLLPIPYNEESLTIISNNIDRVQNYLKRTLLIENPASYLEYQTSSYSEPDFLAEIIKRTEARLLLDINNIYVSCSNNKRDPYQYIQRIPHEAVQEIHLAGHSIVYQDNTNFLRIDTHNNYVCPEVWDLYRYAIHYTGLVPTLLEWDTEIPSLDTLLNEARKSACYA
lpg0677	hypothetical protein	MSQNWPTRDKDLQTARVIMEEYANERDSDSLGLFEIVVDQNEKRMNFRLSGWVVILAKHFTSLYGVSQGDYVTRQVISRCITQGQTLH
lpg0678	arginine ABC transporter substrate-bindingprotein	MKIPMKFIQGLLLSFLFLVSPLHAQNEPVPLIVGVGGFYPPFIMQGTNNELFGYDIATMTELCKIMKRQCNFRVMRFRQLIPALINKQVDAAISAISITSERASLVNFSMPYLLSYSRFLTNNIHNTHQPFNLMLLKGKRIGVEENTVFSQEIRRMGIIDPVIVEFDRTEEMLEALNANEVDFVLMDNPAALYWSANSSGRLLVVGSPMLVGYGLGIAVNRENAELLKSLNDALIEYQRSEKYKENYNKYMMNF
lpg0679	adenylyl transferase	MSPQSDIETLISTKSWLIEKYVAPLHHPLRESAEKLILVSDYASRQIKLLVSLLESDSCCFLWSRESYFYAIQQISLELSQAQYMQELRRFRHTHFLRLLLLEIAGLASTQEVMQSWSDLADSIILHTLKYIGFTLLSRYGVPRNSEGKEIQLYALAMGKLGGRELNYSSDIDLIFAFNEVGCTDGEEQITNQHYFSKMVQTFVHLLQSVTPDGFVFRVDLRLRPNGDSGPLVSSFAAMETYYQEQGRDWERYAMVKARVIAESLNEPFPWFERLIIPFVYRRYVDFGVIESLRGMKAMIEREVQLNPLLNDIKRGRGGIREIEFIIQNIQLIRGGRLPQLQVQNAMLALAVIKKEKLLPRCDALKQAYLFLRKLENILQSLNDQQTHSLPEDQLKKVQ…
lpg0680	dipeptidyl aminopeptidase/acylaminoacylpeptidase	MAIHFTFSYSVIFREFFTIMHANYYDVYQKTGIFSDEFFGQFLRTLGKCYVRCADVGECYATLSKITDKDGESWYKAWYEMADILKTKANISWEANHFITAAYAYLRAAEYYRASEFFLRANPDDPRVIPCFDQLQFCFERAMHRLHPGSQKIWIPYDDQTLSGYLFFSDQSPKATLIVPGGYDSTFEENYALVPAALLHGYHILIFDGPGQGHVLRRQKLYMRADFEHVVSQVLDWLDEQNGLGTSNYVLIGRSFGGYLAPRAACGEKRLAALICDPGQMDIAGSLNKMLPPNLMMLLKERKADELNACFYQLFSENPMKEFYFKSRMYTHGLTTPFDYLQALSAYTFSDRVQEITCPTLVCDNPSDRISNRGNTLYEALRCEKTYVMFDAKLGAGMH…
