# Supplementary material for: Searching algorithm for Type IV effector proteins (S4TE) 2.0: Improved tools for Type IV effector prediction, analysis and comparison in proteobacteria
Source: PLoS Comput Biol. 2019 Mar 25;15(3):e1006847. doi: 10.1371/journal.pcbi.1006847 (PMC6448907; doi:10.1371/journal.pcbi.1006847)
Supplement: S5 Dataset — (XLSX) [file pcbi.1006847.s005.xlsx]

## Sheet: Genome.csv
Dataset 5 - Bacterial genomes present in S4TE 2.0 database
Genomes
Anaplasma centrale str. Israel
Anaplasma marginale str. Dawn genome.
Anaplasma marginale str. Florida
Anaplasma marginale str. Gypsy Plains genome.
Anaplasma marginale str. St. Maries
Anaplasma phagocytophilum HZ
Anaplasma phagocytophilum str. Dog2 genome.
Anaplasma phagocytophilum str. HZ2
Anaplasma phagocytophilum str. JM
Bartonella australis Aust-NH1
Bartonella bacilliformis KC583
Bartonella clarridgeiae strain 73
Bartonella grahamii as4aup
Bartonella grahamii as4aup plasmid pBGR3
Bartonella henselae strain Houston-1
Bartonella quintana RM-11
Bartonella quintana str. Toulouse
Bartonella tribocorum CIP 105476 complete genome
Bartonella tribocorum CIP 105476 plasmid pBT complete genome
Bartonella vinsonii subsp. berkhoffii str. Winnie
Bordetella avium 197N complete genome.
Bordetella bronchiseptica 253 complete genome.
Bordetella bronchiseptica MO149 complete genome.
Bordetella bronchiseptica strain RB50
Bordetella parapertussis Bpp5 complete genome.
Bordetella parapertussis Bpp5 plasmid BPP5P1
Bordetella parapertussis strain 12822
Bordetella pertussis 18323 complete genome.
Bordetella pertussis CS
Bordetella pertussis strain Tohama I
Brucella abortus A13334 chromosome 1
Brucella abortus A13334 chromosome 2
Brucella abortus biovar 1 str. 9-941 chromosome I
Brucella abortus biovar 1 str. 9-941 chromosome II
Brucella abortus S19 chromosome 1
Brucella abortus S19 chromosome 2
Brucella canis ATCC 23365 chromosome I
Brucella canis ATCC 23365 chromosome II
Brucella canis HSK A52141 chromosome 1
Brucella canis HSK A52141 chromosome 2
Brucella ceti TE10759-12 chromosome 1
Brucella ceti TE10759-12 chromosome 2
Brucella ceti TE28753-12 chromosome 1
Brucella ceti TE28753-12 chromosome 2
Brucella melitensis 16M chromosome II
Brucella melitensis ATCC 23457 chromosome I
Brucella melitensis ATCC 23457 chromosome II
Brucella melitensis biovar Abortus 2308 chromosome II
Brucella melitensis bv. 1 str. 16M chromosome I
Brucella melitensis M28 chromosome 1
Brucella melitensis M28 chromosome 2
Brucella melitensis M5-90 chromosome I
Brucella melitensis M5-90 chromosome II
Brucella melitensis NI chromosome I
Brucella melitensis NI chromosome II
Brucella microti CCM 4915 chromosome 1
Brucella microti CCM 4915 chromosome 2
Brucella ovis ATCC 25840 chromosome I
Brucella ovis ATCC 25840 chromosome II
Brucella pinnipedialis B2-94 chromosome 1
Brucella pinnipedialis B2-94 chromosome 2
Brucella suis 1330 chromosome I
Brucella suis 1330 chromosome II
Brucella suis ATCC 23445 chromosome I
Brucella suis ATCC 23445 chromosome II
Brucella suis VBI22 chromosome I
Brucella suis VBI22 chromosome II
Burkholderia ambifaria AMMD chromosome 1
Burkholderia ambifaria AMMD chromosome 2
Burkholderia ambifaria AMMD chromosome 3
Burkholderia ambifaria MC40-6 chromosome 1
Burkholderia ambifaria MC40-6 chromosome 2
Burkholderia ambifaria MC40-6 chromosome 3
Burkholderia ambifaria MC40-6 plasmid pBMC401
Burkholderia cenocepacia AU 1054 chromosome 1
Burkholderia cenocepacia AU 1054 chromosome 2
Burkholderia cenocepacia AU 1054 chromosome 3
Burkholderia cenocepacia HI2424 chromosome 1
Burkholderia cenocepacia HI2424 chromosome 2
Burkholderia cenocepacia HI2424 chromosome 3
Burkholderia cenocepacia HI2424 plasmid 1
Burkholderia cenocepacia J2315 chromosome 1
Burkholderia cenocepacia J2315 chromosome 2
Burkholderia cenocepacia J2315 chromosome 3
Burkholderia cenocepacia J2315 pBCJ2315 plasmid
Burkholderia cenocepacia MC0-3 chromosome 1
Burkholderia cenocepacia MC0-3 chromosome 2
Burkholderia cenocepacia MC0-3 chromosome 3
Burkholderia cepacia AMMD plasmid 1
Burkholderia cepacia GG4 chromosome 1
Burkholderia cepacia GG4 chromosome 2
Burkholderia gladioli BSR3 chromosome 1
Burkholderia gladioli BSR3 chromosome 2
Burkholderia gladioli BSR3 plasmid bgla_1p
Burkholderia gladioli BSR3 plasmid bgla_2p
Burkholderia gladioli BSR3 plasmid bgla_3p
Burkholderia gladioli BSR3 plasmid bgla_4p
Burkholderia glumae BGR1 chromosome 1
Burkholderia glumae BGR1 chromosome 2
Burkholderia glumae BGR1 plasmid bglu_1p
Burkholderia glumae BGR1 plasmid bglu_2p
Burkholderia glumae BGR1 plasmid bglu_3p
Burkholderia glumae BGR1 plasmid bglu_4p
Burkholderia mallei ATCC 23344 chromosome 1
Burkholderia mallei ATCC 23344 chromosome 2
Burkholderia mallei NCTC 10229 chromosome I
Burkholderia mallei NCTC 10229 chromosome II
Burkholderia mallei NCTC 10247 chromosome I
Burkholderia mallei NCTC 10247 chromosome II
Burkholderia mallei SAVP1 chromosome I
Burkholderia mallei SAVP1 chromosome II
Burkholderia multivorans ATCC 17616 chromosome 1
Burkholderia multivorans ATCC 17616 chromosome 2
Burkholderia multivorans ATCC 17616 chromosome 3
Burkholderia multivorans ATCC 17616 DNA
Burkholderia multivorans ATCC 17616 genomic DNA
Burkholderia multivorans ATCC 17616 plasmid pBMUL01
Burkholderia multivorans ATCC 17616 plasmid pTGL1 DNA
Burkholderia phenoliruptrix BR3459a chromosome 1
Burkholderia phenoliruptrix BR3459a chromosome 2
Burkholderia phenoliruptrix BR3459a plasmid pSYMBR3459
Burkholderia phymatum STM815 chromosome 1
Burkholderia phymatum STM815 chromosome 2
Burkholderia phymatum STM815 plasmid pBPHY01
Burkholderia phymatum STM815 plasmid pBPHY02
Burkholderia phytofirmans PsJN chromosome 1
Burkholderia phytofirmans PsJN chromosome 2
Burkholderia phytofirmans PsJN plasmid pBPHYT01
Burkholderia pseudomallei 1026b chromosome 1
Burkholderia pseudomallei 1026b chromosome 2
Burkholderia pseudomallei 1106a chromosome I
Burkholderia pseudomallei 1106a chromosome II
Burkholderia pseudomallei 1710b chromosome I
Burkholderia pseudomallei 1710b chromosome II
Burkholderia pseudomallei 668 chromosome I
Burkholderia pseudomallei 668 chromosome II
Burkholderia pseudomallei BPC006 chromosome I
Burkholderia pseudomallei BPC006 chromosome II
Burkholderia pseudomallei MSHR305 chromosome 1
Burkholderia pseudomallei MSHR305 chromosome 2
Burkholderia pseudomallei NAU20B-16 chromosome 1
Burkholderia pseudomallei NAU20B-16 chromosome 2
Burkholderia pseudomallei NCTC 13178 chromosome 1
Burkholderia pseudomallei NCTC 13178 chromosome 2
Burkholderia pseudomallei NCTC 13179 chromosome 1
Burkholderia pseudomallei NCTC 13179 chromosome 2
Burkholderia pseudomallei strain K96243
Burkholderia rhizoxinica HKI 454 plasmid pBRH01
Burkholderia sp. 383
Burkholderia sp. 383 chromosome 1
Burkholderia sp. 383 chromosome 3
Burkholderia sp. CCGE1001 chromosome 1
Burkholderia sp. CCGE1001 chromosome 2
Burkholderia sp. CCGE1002 chromosome 1
Burkholderia sp. CCGE1002 chromosome 2
Burkholderia sp. CCGE1002 chromosome 3
Burkholderia sp. CCGE1002 plasmid pBC201
Burkholderia sp. CCGE1003 chromosome 1
Burkholderia sp. CCGE1003 chromosome 2
Burkholderia sp. KJ006 chromosome 1
Burkholderia sp. KJ006 chromosome 2
Burkholderia sp. KJ006 chromosome 3
Burkholderia sp. KJ006 plasmid pKJ006
Burkholderia sp. RPE64 DNA
Burkholderia sp. RPE64 plasmid p1 DNA
Burkholderia sp. RPE64 plasmid p2 DNA
Burkholderia sp. YI23 chromosome 1
Burkholderia sp. YI23 chromosome 2
Burkholderia sp. YI23 chromosome 3
Burkholderia sp. YI23 plasmid byi_1p
Burkholderia sp. YI23 plasmid byi_2p
Burkholderia sp. YI23 plasmid byi_3p
Burkholderia thailandensis E264 chromosome I
Burkholderia thailandensis E264 chromosome II
Burkholderia thailandensis MSMB121 chromosome 1
Burkholderia thailandensis MSMB121 chromosome 2
Burkholderia vietnamiensis G4 chromosome 1
Burkholderia vietnamiensis G4 chromosome 2
Burkholderia vietnamiensis G4 chromosome 3
Burkholderia vietnamiensis G4 plasmid pBVIE01
Burkholderia vietnamiensis G4 plasmid pBVIE02
Burkholderia vietnamiensis G4 plasmid pBVIE03
Burkholderia vietnamiensis G4 plasmid pBVIE04
Burkholderia vietnamiensis G4 plasmid pBVIE05
Burkholderia xenovorans LB400 chromosome 1
Burkholderia xenovorans LB400 chromosome 2
Burkholderia xenovorans LB400 chromosome 3
Coxiella burnetii CbuG_Q212
Coxiella burnetii CbuK_Q154
Coxiella burnetii CbuK_Q154 plasmid pQpRS_K_Q154
Coxiella burnetii Dugway 5J108-111
Coxiella burnetii Dugway 5J108-111 plasmid pQpDG
Coxiella burnetii RSA 331
Coxiella burnetii RSA 331 plasmid QpH1
Coxiella burnetii RSA 493
Coxiella burnetii RSA 493 plasmid pQpH1
Coxiella burnetii str. Namibia genome.
Coxiella burnetii strain 3262
Ehrlichia canis str. Jake
Ehrlichia chaffeensis str. Arkansas
Ehrlichia chaffeensis str. Heartland
Ehrlichia chaffeensis str. Jax
Ehrlichia chaffeensis str. Liberty
Ehrlichia chaffeensis str. Osceola
Ehrlichia chaffeensis str. Saint Vincent
Ehrlichia chaffeensis str. Wakulla
Ehrlichia muris AS145
Ehrlichia ruminantium str. Gardel
Ehrlichia ruminantium str. Welgevonden
Ehrlichia ruminantium strain Welgevonden
Helicobacter bizzozeronii CIII-1 main chromosome
Helicobacter bizzozeronii CIII-1 plasmid pHbz1
Helicobacter cetorum MIT 00-7128
Helicobacter cetorum MIT 00-7128 plasmid pHCW
Helicobacter cetorum MIT 99-5656
Helicobacter cinaedi ATCC BAA-847 DNA
Helicobacter cinaedi PAGU611 DNA
Helicobacter cinaedi PAGU611 plasmid pHci1 DNA
Helicobacter heilmanii ASB1.4 main chromosome
Helicobacter hepaticus ATCC 51449
Helicobacter mustelae 12198 complete genome.
Helicobacter pylori 2017
Helicobacter pylori 2018
Helicobacter pylori 26695
Helicobacter pylori 35A
Helicobacter pylori 51
Helicobacter pylori 52
Helicobacter pylori 83
Helicobacter pylori 908
Helicobacter pylori Aklavik117
Helicobacter pylori Aklavik117 plasmid p1HPAKL117
Helicobacter pylori Aklavik86
Helicobacter pylori Aklavik86 plasmid p1HPAKL86
Helicobacter pylori B38 complete genome
Helicobacter pylori B8 complete genome.
Helicobacter pylori B8 HPB8p plasmid.
Helicobacter pylori BM012A
Helicobacter pylori BM012S
Helicobacter pylori Cuz20
Helicobacter pylori ELS37
Helicobacter pylori ELS37 plasmid pHPELS37
Helicobacter pylori F16 DNA
Helicobacter pylori F30 DNA
Helicobacter pylori F30 plasmid pHPF30 DNA
Helicobacter pylori F32 DNA
Helicobacter pylori F57 DNA
Helicobacter pylori G27
Helicobacter pylori G27 plasmid pHPG27
Helicobacter pylori Gambia94-24
Helicobacter pylori Gambia94-24 plasmid
Helicobacter pylori HPAG1
Helicobacter pylori HPAG1 plasmid pHPAG1
Helicobacter pylori HUP-B14
Helicobacter pylori HUP-B14 plasmid pHPB14
Helicobacter pylori India7
Helicobacter pylori J99
Helicobacter pylori Lithuania75
Helicobacter pylori Lithuania75 plasmid
Helicobacter pylori OK113 DNA
Helicobacter pylori OK310 DNA
Helicobacter pylori OK310 plasmid pHPOK310 DNA
Helicobacter pylori P12
Helicobacter pylori P12 plasmid HPP12
Helicobacter pylori PeCan18
Helicobacter pylori PeCan4
Helicobacter pylori PeCan4 plasmid pHPPC4
Helicobacter pylori Puno120
Helicobacter pylori Puno120 plasmid pHPPN120
Helicobacter pylori Puno135
Helicobacter pylori Rif1
Helicobacter pylori Rif2
Helicobacter pylori Sat464
Helicobacter pylori Sat464 plasmid pHPSAT464
Helicobacter pylori Shi112
Helicobacter pylori Shi169
Helicobacter pylori Shi417
Helicobacter pylori Shi470
Helicobacter pylori SJM180
Helicobacter pylori SNT49
Helicobacter pylori SNT49 plasmid pHPSNT
Helicobacter pylori SouthAfrica20
Helicobacter pylori SouthAfrica7
Helicobacter pylori SouthAfrica7 plasmid
Helicobacter pylori UM032
Helicobacter pylori UM037
Helicobacter pylori UM066
Helicobacter pylori UM298
Helicobacter pylori UM299
Helicobacter pylori v225d
Helicobacter pylori XZ274
Helicobacter pylori XZ274 plasmid pXZ274
Legionella longbeachae NSW150
Legionella longbeachae NSW150 plasmid pLLO.
Legionella oakridgensis ATCC 33761 = DSM 21215
Legionella oakridgensis ATCC 33761 = DSM 21215 plasmid
Legionella pneumophila 2300-99 Alcoy
Legionella pneumophila str. Corby
Legionella pneumophila str. Lens complete genome.
Legionella pneumophila str. Lens plasmid pLPL
Legionella pneumophila str. Paris complete genome.
Legionella pneumophila str. Paris plasmid pLPP
Legionella pneumophila subsp. pneumophila ATCC 43290
Legionella pneumophila subsp. pneumophila LPE509
Legionella pneumophila subsp. pneumophila LPE509 plasmid
Legionella pneumophila subsp. pneumophila str. HL06041035
Legionella pneumophila subsp. pneumophila str. Lorraine chromosome
Legionella pneumophila subsp. pneumophila str. Lorraine plasmid
Legionella pneumophila subsp. pneumophila str. Philadelphia 1
Legionella pneumophila subsp. pneumophila str. Thunder Bay
Listeria monocytogenes 07PF0776
Listeria monocytogenes 08-5578
Listeria monocytogenes 08-5578 plasmid pLM5578
Listeria monocytogenes 08-5923
Listeria monocytogenes 10403S
Listeria monocytogenes Finland 1998
Listeria monocytogenes FSL R2-561
Listeria monocytogenes HCC23
Listeria monocytogenes J0161
Listeria monocytogenes J1-220
Listeria monocytogenes J1816
Listeria monocytogenes La111 complete genome.
Listeria monocytogenes N53-1 complete genome.
Listeria monocytogenes serotype 1-2b str. SLCC2755 plasmid
Listeria monocytogenes serotype 1-2c str. SLCC2372 plasmid
Listeria monocytogenes serotype 4b str. 81-0861
Listeria monocytogenes serotype 4b str. LL195
Listeria monocytogenes serotype 7 str. SLCC2482 complete genome.
Listeria monocytogenes serotype 7 str. SLCC2482 plasmid pLM7UG1
Listeria monocytogenes str. 4b F2365
Listeria monocytogenes strain ATCC 19117
Listeria monocytogenes strain L312
Listeria monocytogenes strain SLCC2372
Listeria monocytogenes strain SLCC2376
Listeria monocytogenes strain SLCC2378
Listeria monocytogenes strain SLCC2479
Listeria monocytogenes strain SLCC2540
Listeria monocytogenes strain SLCC2755
Listeria monocytogenes strain SLCC5850
Listeria monocytogenes strain SLCC7179
Listeria welshimeri serovar 6b str. SLCC5334 complete genome.
Stenotrophomonas maltophilia JV3
Wolbachia endosymbiont of Culex quinquefasciatus Pel strain wPip
Wolbachia endosymbiont of Drosophila melanogaster
Wolbachia endosymbiont of Drosophila simulans wHa
Wolbachia endosymbiont of Drosophila simulans wNo
Wolbachia endosymbiont of Onchocerca ochengi complete genome
Wolbachia endosymbiont strain TRS of Brugia malayi
Wolbachia sp. wRi
